# Supplementary material for: Energetic particle precipitation in ECHAM5/MESSy – Part 2: Solar proton events
Source: Copernicus journal article supplement (doi:10.5194/acp-10-7285-2010), 2010-08-06
Supplement: Supplementary file 2 [file meccanism_funke.pdf › meccanism_funke.pdf]

# The Chemical Mechanism of MECCA

KPP version: 2.2.1\_rs3

MECCA version: 2.5h

Date: November 11, 2009.

Selected reactions:

“(Tr && (G || Het) && !Cl && !Br && !I) || St) && !Hg”

Number of aerosol phases: 0

Number of species in selected mechanism:

Gas phase: 75

Aqueous phase: 0

All species: 75

Number of reactions in selected mechanism:

Gas phase (Gnnn): 136

Aqueous phase (Annn): 0

Henry (Hnnn): 0

Photolysis (Jnnn): 44

Heterogeneous (HETnnn): 13

Equilibria (EQnn): 0

Dummy (Dnn): 0

All equations: 193

Further information can be found in the article “Technical Note:  
The new comprehensive atmospheric chemistry module MECCA” by  
R. Sander et al. (Atmos. Chem. Phys. **5**, 445-450, 2005), available at  
<http://www.atmos-chem-phys.net/5/445>.

Table 1: Gas phase reactions

| #      | labels | reaction                                | rate coefficient                                      | reference                                             |
|--------|--------|-----------------------------------------|-------------------------------------------------------|-------------------------------------------------------|
| G1000  | StTrG  | $O_2 + O(^1D) \rightarrow O(^3P) + O_2$ | $3.3E-11*EXP(55./temp)$                               | Sander et al. (2006)                                  |
| G1001  | StTrG  | $O_2 + O(^3P) \rightarrow O_3$          | $6.E-34*((temp/300.)**(-2.4))*cair$                   | Sander et al. (2006)                                  |
| G1002  | StG    | $O_3 + O(^1D) \rightarrow 2 O_2$        | $1.2E-10$                                             | Sander et al. (2006)*                                 |
| G1003  | StG    | $O_3 + O(^3P) \rightarrow 2 O_2$        | $8.E-12*EXP(-2060./temp)$                             | Sander et al. (2006)                                  |
| G2100  | StTrG  | $H + O_2 \rightarrow HO_2$              | $k\_3rd(temp, cair, 4.4E-32, 1.3, 4.7E-11, 0.2, 0.6)$ | Sander et al. (2006)                                  |
| G2101  | StG    | $H + O_3 \rightarrow OH + O_2$          | $1.4E-10*EXP(-470./temp)$                             | Sander et al. (2006)                                  |
| G2102  | StG    | $H_2 + O(^1D) \rightarrow H + OH$       | $1.1E-10$                                             | Sander et al. (2006)                                  |
| G2103  | StG    | $OH + O(^3P) \rightarrow H + O_2$       | $2.2E-11*EXP(120./temp)$                              | Sander et al. (2006)                                  |
| G2104  | StTrG  | $OH + O_3 \rightarrow HO_2 + O_2$       | $1.7E-12*EXP(-940./temp)$                             | Sander et al. (2006)                                  |
| G2105  | StTrG  | $OH + H_2 \rightarrow H_2O + H$         | $2.8E-12*EXP(-1800./temp)$                            | Sander et al. (2006)                                  |
| G2106  | StG    | $HO_2 + O(^3P) \rightarrow OH + O_2$    | $3.E-11*EXP(200./temp)$                               | Sander et al. (2006)                                  |
| G2107  | StTrG  | $HO_2 + O_3 \rightarrow OH + 2 O_2$     | $1.E-14*EXP(-490./temp)$                              | Sander et al. (2006)                                  |
| G2108a | StG    | $HO_2 + H \rightarrow 2 OH$             | $7.2E-11$                                             | Sander et al. (2006)                                  |
| G2108b | StG    | $HO_2 + H \rightarrow H_2 + O_2$        | $6.9E-12$                                             | Sander et al. (2006)                                  |
| G2108c | StG    | $HO_2 + H \rightarrow O(^3P) + H_2O$    | $1.6E-12$                                             | Sander et al. (2006)                                  |
| G2109  | StTrG  | $HO_2 + OH \rightarrow H_2O + O_2$      | $4.8E-11*EXP(250./temp)$                              | Sander et al. (2006)                                  |
| G2110  | StTrG  | $HO_2 + HO_2 \rightarrow H_2O_2 + O_2$  | $k\_H02\_H02$                                         | Christensen et al. (2002), Kircher and Sander (1984)* |
| G2111  | StTrG  | $H_2O + O(^1D) \rightarrow 2 OH$        | $1.63E-10*EXP(60./temp)$                              | Sander et al. (2006)                                  |
| G2112  | StTrG  | $H_2O_2 + OH \rightarrow H_2O + HO_2$   | $1.8E-12$                                             | Sander et al. (2006)                                  |
| G3100  | StGN   | $N + O_2 \rightarrow NO + O(^3P)$       | $1.5E-11*EXP(-3600./temp)$                            | Sander et al. (2006)                                  |
| G3101  | StTrG  | $N_2 + O(^1D) \rightarrow O(^3P) + N_2$ | $2.15E-11*EXP(110./temp)$                             | Sander et al. (2006)                                  |
| G3102a | StGN   | $N_2O + O(^1D) \rightarrow 2 NO$        | $6.7E-11*EXP(20./temp)$                               | Sander et al. (2006)                                  |
| G3102b | StGN   | $N_2O + O(^1D) \rightarrow N_2 + O_2$   | $4.7E-11*EXP(20./temp)$                               | Sander et al. (2006)                                  |
| G3103  | StTrGN | $NO + O_3 \rightarrow NO_2 + O_2$       | $3.E-12*EXP(-1500./temp)$                             | Sander et al. (2006)                                  |
| G3104  | StGN   | $NO + N \rightarrow O(^3P) + N_2$       | $2.1E-11*EXP(100./temp)$                              | Sander et al. (2006)                                  |
| G3105  | StGN   | $NO_2 + O(^3P) \rightarrow NO + O_2$    | $5.1E-12*EXP(210./temp)$                              | Sander et al. (2006)                                  |
| G3106  | StTrGN | $NO_2 + O_3 \rightarrow NO_3 + O_2$     | $1.2E-13*EXP(-2450./temp)$                            | Sander et al. (2006)                                  |
| G3107a | StGN   | $NO_2 + N \rightarrow N_2O + O(^3P)$    | $0.5 * 5.8E-12*EXP(220./temp)$                        | Sander et al. (2006), Funke et al. (2008)             |
| G3107b | StGN   | $NO_2 + N \rightarrow NO + NO$          | $0.25 * 5.8E-12*EXP(220./temp)$                       | Funke et al. (2008)                                   |
| G3107c | StGN   | $NO_2 + N \rightarrow N_2 + O_2$        | $0.25 * 5.8E-12*EXP(220./temp)$                       | Funke et al. (2008)                                   |
| G3108  | StTrGN | $NO_3 + NO \rightarrow 2 NO_2$          | $1.5E-11*EXP(170./temp)$                              | Sander et al. (2006)                                  |

Table 1: Gas phase reactions (... continued)

| #      | labels | reaction                                                                                                                                                  | rate coefficient                                    | reference                 |
|--------|--------|-----------------------------------------------------------------------------------------------------------------------------------------------------------|-----------------------------------------------------|---------------------------|
| G3109  | StTrGN | $\text{NO}_3 + \text{NO}_2 \rightarrow \text{N}_2\text{O}_5$                                                                                              | k_N03_N02                                           | Sander et al. (2006)*     |
| G3110  | StTrGN | $\text{N}_2\text{O}_5 \rightarrow \text{NO}_2 + \text{NO}_3$                                                                                              | k_N03_N02/(2.7E-27*EXP(11000./temp))                | Sander et al. (2006)*     |
| G3200  | TrG    | $\text{NO} + \text{OH} \rightarrow \text{HONO}$                                                                                                           | k_3rd(temp, cair, 7.0E-31, 2.6, 3.6E-11, 0.1, 0.6)  | Sander et al. (2006)      |
| G3201  | StTrGN | $\text{NO} + \text{HO}_2 \rightarrow \text{NO}_2 + \text{OH}$                                                                                             | 3.5E-12*EXP(250./temp)                              | Sander et al. (2006)      |
| G3202  | StTrGN | $\text{NO}_2 + \text{OH} \rightarrow \text{HNO}_3$                                                                                                        | k_3rd(temp, cair, 1.8E-30, 3.0, 2.8E-11, 0., 0.6)   | Sander et al. (2006)      |
| G3203  | StTrGN | $\text{NO}_2 + \text{HO}_2 \rightarrow \text{HNO}_4$                                                                                                      | k_N02_H02                                           | Sander et al. (2006)*     |
| G3204  | TrGN   | $\text{NO}_3 + \text{HO}_2 \rightarrow \text{NO}_2 + \text{OH} + \text{O}_2$                                                                              | 3.5E-12                                             | Sander et al. (2006)      |
| G3205  | TrG    | $\text{HONO} + \text{OH} \rightarrow \text{NO}_2 + \text{H}_2\text{O}$                                                                                    | 1.8E-11*EXP(-390./temp)                             | Sander et al. (2006)      |
| G3206  | StTrGN | $\text{HNO}_3 + \text{OH} \rightarrow \text{H}_2\text{O} + \text{NO}_3$                                                                                   | k_HN03_OH                                           | Sander et al. (2006)*     |
| G3207  | StTrGN | $\text{HNO}_4 \rightarrow \text{NO}_2 + \text{HO}_2$                                                                                                      | k_N02_H02/(2.1E-27*EXP(10900./temp))                | Sander et al. (2006)*     |
| G3208  | StTrGN | $\text{HNO}_4 + \text{OH} \rightarrow \text{NO}_2 + \text{H}_2\text{O}$                                                                                   | 1.3E-12*EXP(380./temp)                              | Sander et al. (2006)      |
| G4100  | StG    | $\text{CH}_4 + \text{O}(^1\text{D}) \rightarrow .75 \text{CH}_3\text{O}_2 + .75 \text{OH} + .25 \text{HCHO} + .4 \text{H} + .05 \text{H}_2$               | 1.5E-10                                             | Sander et al. (2006)      |
| G4101  | StTrG  | $\text{CH}_4 + \text{OH} \rightarrow \text{CH}_3\text{O}_2 + \text{H}_2\text{O}$                                                                          | 1.85E-20*EXP(2.82*log(temp)-987./temp)              | Atkinson (2003)*          |
| G4102  | TrG    | $\text{CH}_3\text{OH} + \text{OH} \rightarrow \text{HCHO} + \text{HO}_2$                                                                                  | 2.9E-12*EXP(-345./temp)                             | Sander et al. (2006)      |
| G4103  | StTrG  | $\text{CH}_3\text{O}_2 + \text{HO}_2 \rightarrow \text{CH}_3\text{OOH} + \text{O}_2$                                                                      | 4.1E-13*EXP(750./temp)                              | Sander et al. (2006)*     |
| G4104  | StTrGN | $\text{CH}_3\text{O}_2 + \text{NO} \rightarrow \text{HCHO} + \text{NO}_2 + \text{HO}_2$                                                                   | 2.8E-12*EXP(300./temp)                              | Sander et al. (2006)      |
| G4105  | TrGN   | $\text{CH}_3\text{O}_2 + \text{NO}_3 \rightarrow \text{HCHO} + \text{HO}_2 + \text{NO}_2$                                                                 | 1.3E-12                                             | Atkinson et al. (1999)    |
| G4106a | StTrG  | $\text{CH}_3\text{O}_2 + \text{CH}_3\text{O}_2 \rightarrow 2 \text{HCHO} + 2 \text{HO}_2$                                                                 | 9.5E-14*EXP(390./temp)/(1.+1./26.2*EXP(1130./temp)) | Sander et al. (2006)      |
| G4106b | StTrG  | $\text{CH}_3\text{O}_2 + \text{CH}_3\text{O}_2 \rightarrow \text{HCHO} + \text{CH}_3\text{OH} + \text{O}_2$                                               | 9.5E-14*EXP(390./temp)/(1.+26.2*EXP(-1130./temp))   | Sander et al. (2006)      |
| G4107  | StTrG  | $\text{CH}_3\text{OOH} + \text{OH} \rightarrow .7 \text{CH}_3\text{O}_2 + .3 \text{HCHO} + .3 \text{OH} + \text{H}_2\text{O}$                             | k_CH300H_OH                                         | Sander et al. (2006)*     |
| G4108  | StTrG  | $\text{HCHO} + \text{OH} \rightarrow \text{CO} + \text{H}_2\text{O} + \text{HO}_2$                                                                        | 9.52E-18*EXP(2.03*log(temp)+636./temp)              | Sivakumaran et al. (2003) |
| G4109  | TrGN   | $\text{HCHO} + \text{NO}_3 \rightarrow \text{HNO}_3 + \text{CO} + \text{HO}_2$                                                                            | 3.4E-13*EXP(-1900./temp)                            | Sander et al. (2006)*     |
| G4110  | StTrG  | $\text{CO} + \text{OH} \rightarrow \text{H} + \text{CO}_2$                                                                                                | 1.57E-13 + cair*3.54E-33                            | McCabe et al. (2001)      |
| G4111  | TrG    | $\text{HCOOH} + \text{OH} \rightarrow \text{HO}_2$                                                                                                        | 4.0E-13                                             | Sander et al. (2006)      |
| G4200  | TrGC   | $\text{C}_2\text{H}_6 + \text{OH} \rightarrow \text{C}_2\text{H}_5\text{O}_2 + \text{H}_2\text{O}$                                                        | 1.49E-17*temp*temp*EXP(-499./temp)                  | Atkinson (2003)           |
| G4203  | TrGC   | $\text{C}_2\text{H}_5\text{O}_2 + \text{HO}_2 \rightarrow \text{C}_2\text{H}_5\text{OOH}$                                                                 | 7.5E-13*EXP(700./temp)                              | Sander et al. (2006)      |
| G4204  | TrGNC  | $\text{C}_2\text{H}_5\text{O}_2 + \text{NO} \rightarrow \text{CH}_3\text{CHO} + \text{HO}_2 + \text{NO}_2$                                                | 2.6E-12*EXP(365./temp)                              | Sander et al. (2006)      |
| G4205  | TrGNC  | $\text{C}_2\text{H}_5\text{O}_2 + \text{NO}_3 \rightarrow \text{CH}_3\text{CHO} + \text{HO}_2 + \text{NO}_2$                                              | 2.3E-12                                             | Atkinson et al. (1999)    |
| G4206  | TrGC   | $\text{C}_2\text{H}_5\text{O}_2 + \text{CH}_3\text{O}_2 \rightarrow .75 \text{HCHO} + \text{HO}_2 + .75 \text{CH}_3\text{CHO} + .25 \text{CH}_3\text{OH}$ | 1.6E-13*EXP(195./temp)                              | see note                  |

Table 1: Gas phase reactions (... continued)

| #      | labels  | reaction                                                                                                                                                                                                                                                                                                                 | rate coefficient                                                                         | reference                                              |
|--------|---------|--------------------------------------------------------------------------------------------------------------------------------------------------------------------------------------------------------------------------------------------------------------------------------------------------------------------------|------------------------------------------------------------------------------------------|--------------------------------------------------------|
| G4207  | TrGC    | $\text{C}_2\text{H}_5\text{OOH} + \text{OH} \rightarrow .3 \text{ C}_2\text{H}_5\text{O}_2 + .7 \text{ CH}_3\text{CHO} + .7 \text{ OH}$                                                                                                                                                                                  | k_CH300H_OH                                                                              | see note                                               |
| G4208  | TrGC    | $\text{CH}_3\text{CHO} + \text{OH} \rightarrow \text{CH}_3\text{C(O)OO} + \text{H}_2\text{O}$                                                                                                                                                                                                                            | $4.4\text{E-}12*\text{EXP}(365./\text{temp})$                                            | Atkinson et al. (2006)                                 |
| G4209  | TrGNC   | $\text{CH}_3\text{CHO} + \text{NO}_3 \rightarrow \text{CH}_3\text{C(O)OO} + \text{HNO}_3$                                                                                                                                                                                                                                | $1.4\text{E-}12*\text{EXP}(-1900./\text{temp})$                                          | Sander et al. (2006)                                   |
| G4210  | TrGC    | $\text{CH}_3\text{COOH} + \text{OH} \rightarrow \text{CH}_3\text{O}_2 + \text{CO}_2 + \text{H}_2\text{O}$                                                                                                                                                                                                                | $4.2\text{E-}14*\text{EXP}(855./\text{temp})$                                            | Atkinson et al. (2006)                                 |
| G4211a | TrGC    | $\text{CH}_3\text{C(O)OO} + \text{HO}_2 \rightarrow \text{CH}_3\text{C(O)OOH}$                                                                                                                                                                                                                                           | $4.3\text{E-}13*\text{EXP}(1040./\text{temp})/(1.+1./37.*\text{EXP}(660./\text{temp}))$  | Tyndall et al. (2001)                                  |
| G4211b | TrGC    | $\text{CH}_3\text{C(O)OO} + \text{HO}_2 \rightarrow \text{CH}_3\text{COOH} + \text{O}_3$                                                                                                                                                                                                                                 | $4.3\text{E-}13*\text{EXP}(1040./\text{temp})/(1.+37.*\text{EXP}(-660./\text{temp}))$    | Tyndall et al. (2001)                                  |
| G4212  | TrGNC   | $\text{CH}_3\text{C(O)OO} + \text{NO} \rightarrow \text{CH}_3\text{O}_2 + \text{NO}_2$                                                                                                                                                                                                                                   | $8.1\text{E-}12*\text{EXP}(270./\text{temp})$                                            | Tyndall et al. (2001)                                  |
| G4213  | TrGNC   | $\text{CH}_3\text{C(O)OO} + \text{NO}_2 \rightarrow \text{PAN}$                                                                                                                                                                                                                                                          | k_PA_NO2                                                                                 | Sander et al. (2006)                                   |
| G4214  | TrGNC   | $\text{CH}_3\text{C(O)OO} + \text{NO}_3 \rightarrow \text{CH}_3\text{O}_2 + \text{NO}_2$                                                                                                                                                                                                                                 | 4.E-12                                                                                   | Canosa-Mas et al. (1996)                               |
| G4215a | TrGC    | $\text{CH}_3\text{C(O)OO} + \text{CH}_3\text{O}_2 \rightarrow \text{HCHO} + \text{HO}_2 + \text{CH}_3\text{O}_2 + \text{CO}_2$                                                                                                                                                                                           | $0.9*2.\text{E-}12*\text{EXP}(500./\text{temp})$                                         | Sander et al. (2006)                                   |
| G4215b | TrGC    | $\text{CH}_3\text{C(O)OO} + \text{CH}_3\text{O}_2 \rightarrow \text{CH}_3\text{COOH} + \text{HCHO}$                                                                                                                                                                                                                      | $0.1*2.\text{E-}12*\text{EXP}(500./\text{temp})$                                         | Sander et al. (2006)                                   |
| G4216  | TrGC    | $\text{CH}_3\text{C(O)OO} + \text{C}_2\text{H}_5\text{O}_2 \rightarrow .82 \text{ CH}_3\text{O}_2 + \text{CH}_3\text{CHO} + .82 \text{ HO}_2 + .18 \text{ CH}_3\text{COOH}$                                                                                                                                              | $4.9\text{E-}12*\text{EXP}(211./\text{temp})$                                            | Atkinson et al. (1999), Kirchner and Stockwell (1996)* |
| G4217  | TrGC    | $\text{CH}_3\text{C(O)OO} + \text{CH}_3\text{C(O)OO} \rightarrow 2 \text{ CH}_3\text{O}_2 + 2 \text{ CO}_2 + \text{O}_2$                                                                                                                                                                                                 | $2.5\text{E-}12*\text{EXP}(500./\text{temp})$                                            | Tyndall et al. (2001)                                  |
| G4218  | TrGC    | $\text{CH}_3\text{C(O)OOH} + \text{OH} \rightarrow \text{CH}_3\text{C(O)OO}$                                                                                                                                                                                                                                             | k_CH300H_OH                                                                              | see note                                               |
| G4220  | TrGNC   | $\text{PAN} + \text{OH} \rightarrow \text{HCHO} + \text{NO}_2$                                                                                                                                                                                                                                                           | 2.E-14                                                                                   | see note                                               |
| G4221  | TrGNC   | $\text{PAN} \rightarrow \text{CH}_3\text{C(O)OO} + \text{NO}_2$                                                                                                                                                                                                                                                          | k_PAN_M                                                                                  | Sander et al. (2006)*                                  |
| G4222  | TrGC    | $\text{C}_2\text{H}_2 + \text{OH} \rightarrow \text{CH}_3\text{O}_2$                                                                                                                                                                                                                                                     | $\text{k\_3rd}(\text{temp}, \text{cair}, 5.5\text{e-}30, 0.0, 8.3\text{e-}13, -2., 0.6)$ | Sander et al. (2006)                                   |
| G4301a | TrGC    | $\text{C}_3\text{H}_6 + \text{O}_3 \rightarrow .57 \text{ HCHO} + .47 \text{ CH}_3\text{CHO} + .33 \text{ OH} + .26 \text{ HO}_2 + .07 \text{ CH}_3\text{O}_2 + .06 \text{ C}_2\text{H}_5\text{O}_2 + .23 \text{ CH}_3\text{C(O)OO} + .06 \text{ CH}_4 + .31 \text{ CO} + .22 \text{ HCOOH} + .03 \text{ CH}_3\text{OH}$ | $6.5\text{E-}15*\text{EXP}(-1900./\text{temp})$                                          | Sander et al. (2003)*                                  |
| G4302a | TrGC    | $\text{C}_3\text{H}_6 + \text{OH} \rightarrow .98 \text{ CH}_3\text{CHO} + .98 \text{ HCHO}$                                                                                                                                                                                                                             | $\text{k\_3rd}(\text{temp}, \text{cair}, 8.\text{E-}27, 3.5, 3.\text{E-}11, 0., 0.5)$    | Atkinson et al. (1999)                                 |
| G4311  | TrGC    | $\text{CH}_3\text{COCH}_3 + \text{OH} \rightarrow \text{CH}_3\text{COCH}_2\text{O}_2 + \text{H}_2\text{O}$                                                                                                                                                                                                               | $1.33\text{E-}13+3.82\text{E-}11*\text{EXP}(-2000./\text{temp})$                         | Sander et al. (2006)                                   |
| G4312a | TrGC    | $\text{CH}_3\text{COCH}_2\text{O}_2 + \text{HO}_2 \rightarrow \text{CH}_3\text{C(O)OO}$                                                                                                                                                                                                                                  | $8.6\text{E-}13*\text{EXP}(700./\text{temp})$                                            | Tyndall et al. (2001)                                  |
| G4313  | TrGNC   | $\text{CH}_3\text{COCH}_2\text{O}_2 + \text{NO} \rightarrow \text{NO}_2 + \text{CH}_3\text{C(O)OO} + \text{HCHO}$                                                                                                                                                                                                        | $2.9\text{E-}12*\text{EXP}(300./\text{temp})$                                            | Sander et al. (2006)                                   |
| G4314a | TrGC    | $\text{CH}_3\text{COCH}_2\text{O}_2 + \text{CH}_3\text{O}_2 \rightarrow .5 \text{ CH}_3\text{OH} + \text{CH}_3\text{C(O)OO} + .8 \text{ HCHO} + .3 \text{ HO}_2$                                                                                                                                                         | $7.5\text{E-}13*\text{EXP}(500./\text{temp})$                                            | Tyndall et al. (2001)                                  |
| G4400a | TrGC    | $\text{C}_4\text{H}_{10} + \text{OH} \rightarrow 0.8 \text{ CH}_3\text{C(O)OO} + .85 \text{ CH}_3\text{CHO} + .1 \text{ HCHO}$                                                                                                                                                                                           | $1.81\text{E-}17*\text{temp}*\text{temp}*\text{EXP}(114./\text{temp})$                   | Atkinson (2003)                                        |
| G6100  | StTrGCl | $\text{Cl} + \text{O}_3 \rightarrow \text{ClO} + \text{O}_2$                                                                                                                                                                                                                                                             | $2.8\text{E-}11*\text{EXP}(-250./\text{temp})$                                           | Atkinson et al. (2007)                                 |
| G6101  | StGCl   | $\text{ClO} + \text{O}(^3\text{P}) \rightarrow \text{Cl} + \text{O}_2$                                                                                                                                                                                                                                                   | $2.5\text{E-}11*\text{EXP}(110./\text{temp})$                                            | Atkinson et al. (2007)                                 |

Table 1: Gas phase reactions (... continued)

| #      | labels   | reaction                                                                                               | rate coefficient                                                                               | reference                                     |
|--------|----------|--------------------------------------------------------------------------------------------------------|------------------------------------------------------------------------------------------------|-----------------------------------------------|
| G6102a | StTrGCl  | $\text{ClO} + \text{ClO} \rightarrow \text{Cl}_2 + \text{O}_2$                                         | $1.0\text{E-}12*\text{EXP}(-1590./\text{temp})$                                                | Atkinson et al. (2007)                        |
| G6102b | StTrGCl  | $\text{ClO} + \text{ClO} \rightarrow 2 \text{Cl} + \text{O}_2$                                         | $3.0\text{E-}11*\text{EXP}(-2450./\text{temp})$                                                | Atkinson et al. (2007)                        |
| G6102c | StTrGCl  | $\text{ClO} + \text{ClO} \rightarrow \text{Cl} + \text{OClO}$                                          | $3.5\text{E-}13*\text{EXP}(-1370./\text{temp})$                                                | Atkinson et al. (2007)                        |
| G6102d | StTrGCl  | $\text{ClO} + \text{ClO} \rightarrow \text{Cl}_2\text{O}_2$                                            | $k_{\text{ClO-ClO}}$                                                                           | Atkinson et al. (2007)                        |
| G6103  | StTrGCl  | $\text{Cl}_2\text{O}_2 \rightarrow \text{ClO} + \text{ClO}$                                            | $k_{\text{ClO-ClO}}/(9.3\text{E-}28*\text{EXP}(8835./\text{temp}))$                            | Atkinson et al. (2007), Sander et al. (2006)* |
| G6200  | StGCl    | $\text{Cl} + \text{H}_2 \rightarrow \text{HCl} + \text{H}$                                             | $3.9\text{E-}11*\text{EXP}(-2310./\text{temp})$                                                | Atkinson et al. (2007)                        |
| G6201a | StGCl    | $\text{Cl} + \text{HO}_2 \rightarrow \text{HCl} + \text{O}_2$                                          | $4.4\text{E-}11-7.5\text{E-}11*\text{EXP}(-620./\text{temp})$                                  | Atkinson et al. (2007)                        |
| G6201b | StGCl    | $\text{Cl} + \text{HO}_2 \rightarrow \text{ClO} + \text{OH}$                                           | $7.5\text{E-}11*\text{EXP}(-620./\text{temp})$                                                 | Atkinson et al. (2007)                        |
| G6202  | StTrGCl  | $\text{Cl} + \text{H}_2\text{O}_2 \rightarrow \text{HCl} + \text{HO}_2$                                | $1.1\text{E-}11*\text{EXP}(-980./\text{temp})$                                                 | Atkinson et al. (2007)                        |
| G6203  | StGCl    | $\text{ClO} + \text{OH} \rightarrow .94 \text{Cl} + .94 \text{HO}_2 + .06 \text{HCl} + .06 \text{O}_2$ | $7.3\text{E-}12*\text{EXP}(300./\text{temp})$                                                  | Atkinson et al. (2007)                        |
| G6204  | StTrGCl  | $\text{ClO} + \text{HO}_2 \rightarrow \text{HOCl}$                                                     | $2.2\text{E-}12*\text{EXP}(340./\text{temp})$                                                  | Atkinson et al. (2007)                        |
| G6205  | StTrGCl  | $\text{HCl} + \text{OH} \rightarrow \text{Cl} + \text{H}_2\text{O}$                                    | $1.7\text{E-}12*\text{EXP}(-230./\text{temp})$                                                 | Atkinson et al. (2007)                        |
| G6206  | StGCl    | $\text{HOCl} + \text{OH} \rightarrow \text{ClO} + \text{H}_2\text{O}$                                  | $3.0\text{E-}12*\text{EXP}(-500./\text{temp})$                                                 | Sander et al. (2006)                          |
| G6300  | StTrGNCl | $\text{ClO} + \text{NO} \rightarrow \text{NO}_2 + \text{Cl}$                                           | $6.2\text{E-}12*\text{EXP}(295./\text{temp})$                                                  | Atkinson et al. (2007)                        |
| G6301  | StTrGNCl | $\text{ClO} + \text{NO}_2 \rightarrow \text{ClNO}_3$                                                   | $k_{\text{3rd-iupac}}(\text{temp}, \text{cair}, 1.6\text{E-}31, 3.4, 7.5\text{E-}11, 0., 0.4)$ | Atkinson et al. (2007)                        |
| G6303  | StGNCl   | $\text{ClNO}_3 + \text{O}(^3\text{P}) \rightarrow \text{ClO} + \text{NO}_3$                            | $4.5\text{E-}12*\text{EXP}(-900./\text{temp})$                                                 | Atkinson et al. (2007)                        |
| G6304  | StTrGNCl | $\text{ClNO}_3 + \text{Cl} \rightarrow \text{Cl}_2 + \text{NO}_3$                                      | $6.2\text{E-}12*\text{EXP}(145./\text{temp})$                                                  | Atkinson et al. (2007)                        |
| G6400  | StTrGCl  | $\text{Cl} + \text{CH}_4 \rightarrow \text{HCl} + \text{CH}_3\text{O}_2$                               | $6.6\text{E-}12*\text{EXP}(-1240./\text{temp})$                                                | Atkinson et al. (2006)                        |
| G6401  | StTrGCl  | $\text{Cl} + \text{HCHO} \rightarrow \text{HCl} + \text{CO} + \text{HO}_2$                             | $8.1\text{E-}11*\text{EXP}(-34./\text{temp})$                                                  | Atkinson et al. (2006)                        |
| G6402  | StTrGCl  | $\text{Cl} + \text{CH}_3\text{OOH} \rightarrow \text{HCHO} + \text{HCl} + \text{OH}$                   | $5.9\text{E-}11$                                                                               | Atkinson et al. (2006)*                       |
| G6403  | StTrGCl  | $\text{ClO} + \text{CH}_3\text{O}_2 \rightarrow \text{HO}_2 + \text{Cl} + \text{HCHO}$                 | $3.3\text{E-}12*\text{EXP}(-115./\text{temp})$                                                 | Sander et al. (2006)                          |
| G6404  | StGCl    | $\text{CCl}_4 + \text{O}(^1\text{D}) \rightarrow \text{ClO} + 3 \text{Cl}$                             | $3.3\text{E-}10$                                                                               | Sander et al. (2006)                          |
| G6405  | StGCl    | $\text{CH}_3\text{Cl} + \text{O}(^1\text{D}) \rightarrow \text{OH} + \text{Cl}$                        | $1.65\text{E-}10$                                                                              | see note                                      |
| G6406  | StGCl    | $\text{CH}_3\text{Cl} + \text{OH} \rightarrow \text{H}_2\text{O} + \text{Cl}$                          | $2.4\text{E-}12*\text{EXP}(-1250./\text{temp})$                                                | Sander et al. (2006)                          |
| G6407  | StGCCl   | $\text{CH}_3\text{CCl}_3 + \text{O}(^1\text{D}) \rightarrow \text{OH} + 3 \text{Cl}$                   | $3.5\text{E-}10$                                                                               | see note                                      |
| G6408  | StTrGCCl | $\text{CH}_3\text{CCl}_3 + \text{OH} \rightarrow \text{H}_2\text{O} + 3 \text{Cl}$                     | $1.64\text{E-}12*\text{EXP}(-1520./\text{temp})$                                               | Sander et al. (2006)                          |
| G6500  | StGFCl   | $\text{CF}_2\text{Cl}_2 + \text{O}(^1\text{D}) \rightarrow \text{ClO} + \text{Cl}$                     | $1.4\text{E-}10$                                                                               | Sander et al. (2006)                          |
| G6501  | StGFCl   | $\text{CFCl}_3 + \text{O}(^1\text{D}) \rightarrow \text{ClO} + 2 \text{Cl}$                            | $2.3\text{E-}10$                                                                               | Sander et al. (2006)                          |
| G7100  | StTrGBr  | $\text{Br} + \text{O}_3 \rightarrow \text{BrO} + \text{O}_2$                                           | $1.7\text{E-}11*\text{EXP}(-800./\text{temp})$                                                 | Atkinson et al. (2007)                        |
| G7101  | StGBr    | $\text{BrO} + \text{O}(^3\text{P}) \rightarrow \text{Br} + \text{O}_2$                                 | $1.9\text{E-}11*\text{EXP}(230./\text{temp})$                                                  | Atkinson et al. (2007)                        |
| G7200  | StTrGBr  | $\text{Br} + \text{HO}_2 \rightarrow \text{HBr} + \text{O}_2$                                          | $7.7\text{E-}12*\text{EXP}(-450./\text{temp})$                                                 | Atkinson et al. (2007)                        |
| G7201  | StTrGBr  | $\text{BrO} + \text{HO}_2 \rightarrow \text{HOBr} + \text{O}_2$                                        | $4.5\text{E-}12*\text{EXP}(500./\text{temp})$                                                  | Atkinson et al. (2007)                        |
| G7202  | StTrGBr  | $\text{HBr} + \text{OH} \rightarrow \text{Br} + \text{H}_2\text{O}$                                    | $6.7\text{E-}12*\text{EXP}(155./\text{temp})$                                                  | Atkinson et al. (2007)                        |

Table 1: Gas phase reactions (... continued)

| #      | labels    | reaction                                                                                                                                                | rate coefficient                                  | reference               |
|--------|-----------|---------------------------------------------------------------------------------------------------------------------------------------------------------|---------------------------------------------------|-------------------------|
| G7203  | StGBr     | $\text{HOBr} + \text{O}(^3\text{P}) \rightarrow \text{OH} + \text{BrO}$                                                                                 | $1.2\text{E}-10*\text{EXP}(-430./\text{temp})$    | Atkinson et al. (2007)  |
| G7204  | StTrGBr   | $\text{Br}_2 + \text{OH} \rightarrow \text{HOBr} + \text{Br}$                                                                                           | $2.0\text{E}-11*\text{EXP}(240./\text{temp})$     | Atkinson et al. (2007)  |
| G7301  | StTrGNBr  | $\text{BrO} + \text{NO} \rightarrow \text{Br} + \text{NO}_2$                                                                                            | $8.7\text{E}-12*\text{EXP}(260./\text{temp})$     | Atkinson et al. (2007)  |
| G7302  | StTrGNBr  | $\text{BrO} + \text{NO}_2 \rightarrow \text{BrNO}_3$                                                                                                    | k_BrO_NO2                                         | Atkinson et al. (2007)* |
| G7400  | StTrGBr   | $\text{Br} + \text{HCHO} \rightarrow \text{HBr} + \text{CO} + \text{HO}_2$                                                                              | $7.7\text{E}-12*\text{EXP}(-580./\text{temp})$    | Atkinson et al. (2006)  |
| G7403  | StTrGBr   | $\text{CH}_3\text{Br} + \text{OH} \rightarrow \text{H}_2\text{O} + \text{Br}$                                                                           | $2.35\text{E}-12*\text{EXP}(-1300./\text{temp})$  | Sander et al. (2006)    |
| G7603a | StTrGClBr | $\text{BrO} + \text{ClO} \rightarrow \text{Br} + \text{OClO}$                                                                                           | $1.6\text{E}-12*\text{EXP}(430./\text{temp})$     | Atkinson et al. (2007)  |
| G7603b | StTrGClBr | $\text{BrO} + \text{ClO} \rightarrow \text{Br} + \text{Cl} + \text{O}_2$                                                                                | $2.9\text{E}-12*\text{EXP}(220./\text{temp})$     | Atkinson et al. (2007)  |
| G7603c | StTrGClBr | $\text{BrO} + \text{ClO} \rightarrow \text{BrCl} + \text{O}_2$                                                                                          | $5.8\text{E}-13*\text{EXP}(170./\text{temp})$     | Atkinson et al. (2007)  |
| G9200  | StTrGS    | $\text{SO}_2 + \text{OH} \rightarrow \text{H}_2\text{SO}_4 + \text{HO}_2$                                                                               | k_3rd(temp, cair, 3.3E-31, 4.3, 1.6E-12, 0., 0.6) | Sander et al. (2006)    |
| G9400a | TrGS      | $\text{DMS} + \text{OH} \rightarrow \text{CH}_3\text{SO}_2 + \text{HCHO}$                                                                               | $1.13\text{E}-11*\text{EXP}(-253./\text{temp})$   | Atkinson et al. (2004)* |
| G9400b | TrGS      | $\text{DMS} + \text{OH} \rightarrow \text{DMSO} + \text{HO}_2$                                                                                          | k_DMS_OH                                          | Atkinson et al. (2004)* |
| G9401  | TrGNS     | $\text{DMS} + \text{NO}_3 \rightarrow \text{CH}_3\text{SO}_2 + \text{HNO}_3 + \text{HCHO}$                                                              | $1.9\text{E}-13*\text{EXP}(520./\text{temp})$     | Atkinson et al. (2004)  |
| G9402  | TrGS      | $\text{DMSO} + \text{OH} \rightarrow .6 \text{SO}_2 + \text{HCHO} + .6 \text{CH}_3\text{O}_2 + .4 \text{HO}_2$<br>$+ .4 \text{CH}_3\text{SO}_3\text{H}$ | 1.E-10                                            | Hynes and Wine (1996)   |
| G9403  | TrGS      | $\text{CH}_3\text{SO}_2 \rightarrow \text{SO}_2 + \text{CH}_3\text{O}_2$                                                                                | $1.9\text{E}13*\text{EXP}(-8661./\text{temp})$    | Barone et al. (1995)    |
| G9404  | TrGS      | $\text{CH}_3\text{SO}_2 + \text{O}_3 \rightarrow \text{CH}_3\text{SO}_3$                                                                                | 3.E-13                                            | Barone et al. (1995)    |
| G9405  | TrGS      | $\text{CH}_3\text{SO}_3 + \text{HO}_2 \rightarrow \text{CH}_3\text{SO}_3\text{H}$                                                                       | 5.E-11                                            | Barone et al. (1995)    |

\*Notes:

Rate coefficients for three-body reactions are defined via the function `k_3rd(T, M, k0300, n, kinf300, m, fc)`. In the code, the temperature  $T$  is called `temp` and the concentration of “air molecules”  $M$  is called `cair`. Using the auxiliary variables  $k_0(T)$ ,  $k_{\text{inf}}(T)$ , and  $k_{\text{ratio}}$ , `k_3rd` is defined as:

$$k_0(T) = k_0^{300} \times \left(\frac{300\text{K}}{T}\right)^n \quad (1)$$

$$k_{\text{inf}}(T) = k_{\text{inf}}^{300} \times \left(\frac{300\text{K}}{T}\right)^m \quad (2)$$

$$k_{\text{ratio}} = \frac{k_0(T)M}{k_{\text{inf}}(T)} \quad (3)$$

$$\text{k\_3rd} = \frac{k_0(T)M}{1 + k_{\text{ratio}}} \times f_c \left( \frac{1}{1 + (\log_{10}(k_{\text{ratio}}))^2} \right) \quad (4)$$

A similar function, called `k_3rd_iupac` here, is used by Atkinson et al. (2005) for three-body reactions. It has the same function parameters as `k_3rd` and it is defined as:

$$k_0(T) = k_0^{300} \times \left(\frac{300\text{K}}{T}\right)^n \quad (5)$$

$$k_{\text{inf}}(T) = k_{\text{inf}}^{300} \times \left(\frac{300\text{K}}{T}\right)^m \quad (6)$$

$$k_{\text{ratio}} = \frac{k_0(T)M}{k_{\text{inf}}(T)} \quad (7)$$

$$N = 0.75 - 1.27 \times \log_{10}(f_c) \quad (8)$$

$$\text{k\_3rd\_iupac} = \frac{k_0(T)M}{1 + k_{\text{ratio}}} \times f_c \left( \frac{1}{1 + (\log_{10}(k_{\text{ratio}}/N))^2} \right) \quad (9)$$

G1002: The path leading to  $2\text{O}(^3\text{P}) + \text{O}_2$  results in a null cycle regarding odd oxygen and is neglected.

G2110: The rate coefficient is: `k_HO2_HO2 = (1.5E-12*EXP(19./temp)+1.7E-33*EXP(1000./temp)*cair)*(1.+1.4E-21*EXP(2200./temp)*C(ind_H2O))`. The value for the first (pressure-independent) part is from Christensen et al. (2002), the water term from Kircher and Sander (1984).

G3109: The rate coefficient is: `k_NO3_NO2 = k_3rd(temp,cair,2.E-30,4.4,1.4E-12,0.7,0.6)`.

G3110: The rate coefficient is defined as backward reaction divided by equilibrium constant.

G3203: The rate coefficient is: `k_NO2_HO2 = k_3rd(temp,cair,1.8E-31,3.2,4.7E-12,1.4,0.6)`.

G3206: The rate coefficient is: `k_HNO3_OH = 2.4E-14 * EXP(460./temp) + 1./ ( 1./ (6.5E-34 * EXP(1335./temp)*cair) + 1./ (2.7E-17 * EXP(2199./temp)) )`

G3207: The rate coefficient is defined as backward reaction divided by equilibrium constant.

G4103: Sander et al. (2006) recommend a zero product yield for HCHO.

G4107: The rate coefficient is: `k_CH3OOH_OH = 3.8E-12*EXP(200./temp)`.

G4109: The same temperature dependence assumed as for  $\text{CH}_3\text{CHO} + \text{NO}_3$ .

G4206: The rate coefficient was calculated by von Kuhlmann (pers. comm. 2004) using self reactions of  $\text{CH}_3\text{OO}$  and  $\text{C}_2\text{H}_5\text{OO}$  from Sander et al. (2003) and geometric mean as suggested by Madronich and Calvert (1990) and Kirchner and Stockwell (1996). The product distribution (branching=0.5/0.25/0.25) is calculated by von Kuhlmann (pers. comm. 2004) based on Villenave and Lesclaux (1996) and Tyndall et al. (2001).

G4207: Same value as for G4107:  $\text{CH}_3\text{OOH} + \text{OH}$  assumed.

G4216: The value  $1.0\text{E}-11$  is from Atkinson et al. (1999), the temperature dependence from Kirchner and Stockwell (1996).

G4218: Same value as for G4107:  $\text{CH}_3\text{OOH} + \text{OH}$  assumed.

G4220: This is 50% of the upper limit given by Sander et al. (2003), as suggested by von Kuhlmann (2001).

G4221: The rate coefficient is: `k_PAN_M = k_PA_NO2/9.E-29*EXP(-14000./temp)`, i.e. the rate coefficient is defined as backward reaction divided by equilibrium constant.

G4301: The product distribution is for terminal olefin carbons from Zaveri and Peters (1999).

G6103: The rate coefficient is defined as backward reaction divided by equilibrium constant.

G6402: The initial products are probably HCl and  $\text{CH}_2\text{OOH}$  (Atkinson et al., 2006). It is assumed that  $\text{CH}_2\text{OOH}$  dissociates into HCHO and OH.

G6405: Average of reactions with  $\text{CH}_3\text{Br}$  and  $\text{CH}_3\text{F}$  from Sander et al. (2006) (B. Steil, pers. comm.).

G6407: Rough extrapolation from reactions with  $\text{CH}_3\text{CF}_3$ ,  $\text{CH}_3\text{CClF}_2$ , and  $\text{CH}_3\text{CCl}_2\text{F}$  from Sander et al. (2006).

G7302: The rate coefficient is: `k_BrO_NO2 = k_3rd(temp,cair,5.2E-31,3.2,6.9E-12,2.9,0.6)`.

G9400: Addition path. The rate coefficient is: `k_DMS_OH = 1.0E-39*EXP(5820./temp)*C(ind_O2) / (1.+5.0E-30*EXP(6280./temp)*C(ind_O2))`.

Table 2: Photolysis reactions

| #      | labels    | reaction                                                                          | rate coefficient | reference |
|--------|-----------|-----------------------------------------------------------------------------------|------------------|-----------|
| J1000  | StTrGJ    | $O_2 + h\nu \rightarrow O(^3P) + O(^3P)$                                          | jx(ip_02)        | see note  |
| J1001a | StTrGJ    | $O_3 + h\nu \rightarrow O(^1D)$                                                   | jx(ip_01D)       | see note  |
| J1001b | StTrGJ    | $O_3 + h\nu \rightarrow O(^3P)$                                                   | jx(ip_03P)       | see note  |
| J2100  | StGJ      | $H_2O + h\nu \rightarrow H + OH$                                                  | jx(ip_H20)       | see note  |
| J2101  | StTrGJ    | $H_2O_2 + h\nu \rightarrow 2 OH$                                                  | jx(ip_H202)      | see note  |
| J3100  | StGNJ     | $N_2O + h\nu \rightarrow O(^1D)$                                                  | jx(ip_N20)       | see note  |
| J3101  | StTrGNJ   | $NO_2 + h\nu \rightarrow NO + O(^3P)$                                             | jx(ip_N02)       | see note  |
| J3102  | StGNJ     | $NO + h\nu \rightarrow N + O(^3P)$                                                | jx(ip_NO)        | see note  |
| J3103a | StTrGNJ   | $NO_3 + h\nu \rightarrow NO_2 + O(^3P)$                                           | jx(ip_N020)      | see note  |
| J3103b | StTrGNJ   | $NO_3 + h\nu \rightarrow NO$                                                      | jx(ip_N002)      | see note  |
| J3104a | StTrGNJ   | $N_2O_5 + h\nu \rightarrow NO_2 + NO_3$                                           | jx(ip_N205)      | see note  |
| J3104b | StGNJ     | $N_2O_5 + h\nu \rightarrow NO + O(^3P) + NO_3$                                    | jx(ip_N03N00)    | see note  |
| J3200  | TrGJ      | $HONO + h\nu \rightarrow NO + OH$                                                 | jx(ip_HONO)      | see note  |
| J3201  | StTrGNJ   | $HNO_3 + h\nu \rightarrow NO_2 + OH$                                              | jx(ip_HN03)      | see note  |
| J3202  | StTrGNJ   | $HNO_4 + h\nu \rightarrow .667 NO_2 + .667 HO_2 + .333 NO_3 + .333 OH$            | jx(ip_HN04)      | see note  |
| J4100  | StTrGJ    | $CH_3OOH + h\nu \rightarrow HCHO + OH + HO_2$                                     | jx(ip_CH300H)    | see note  |
| J4101a | StTrGJ    | $HCHO + h\nu \rightarrow H_2 + CO$                                                | jx(ip_COH2)      | see note  |
| J4101b | StTrGJ    | $HCHO + h\nu \rightarrow H + CO + HO_2$                                           | jx(ip_CHOH)      | see note  |
| J4102  | StGJ      | $CO_2 + h\nu \rightarrow CO + O(^3P)$                                             | jx(ip_CO2)       | see note  |
| J4103  | StGJ      | $CH_4 + h\nu \rightarrow CO + 0.31 H + 0.69 H_2 + 1.155 H_2O$                     | jx(ip_CH4)       | see note  |
| J4200  | TrGCJ     | $C_2H_5OOH + h\nu \rightarrow CH_3CHO + HO_2 + OH$                                | jx(ip_CH300H)    | see note  |
| J4201  | TrGCJ     | $CH_3CHO + h\nu \rightarrow CH_3O_2 + HO_2 + CO$                                  | jx(ip_CH3CHO)    | see note  |
| J4202  | TrGCJ     | $CH_3C(O)OOH + h\nu \rightarrow CH_3O_2 + OH$                                     | jx(ip_PAA)       | see note  |
| J4204  | TrGN CJ   | $PAN + h\nu \rightarrow .6 CH_3C(O)OO + .6 NO_2 + .4 CH_3O_2 + .4 NO_3 + .4 CO_2$ | jx(ip_PAN)       | see note  |
| J4301  | TrGCJ     | $CH_3COCH_3 + h\nu \rightarrow CH_3C(O)OO + CH_3O_2$                              | jx(ip_CH3C0CH3)  | see note  |
| J6000  | StTrGClJ  | $Cl_2 + h\nu \rightarrow Cl + Cl$                                                 | jx(ip_Cl2)       | see note  |
| J6100  | StTrGClJ  | $Cl_2O_2 + h\nu \rightarrow 2 Cl$                                                 | 1.4*jx(ip_Cl202) | see note  |
| J6101  | StTrGClJ  | $OClo + h\nu \rightarrow ClO + O(^3P)$                                            | jx(ip_OCl0)      | see note  |
| J6200  | StGClJ    | $HCl + h\nu \rightarrow Cl + H$                                                   | jx(ip_HCl)       | see note  |
| J6201  | StTrGClJ  | $HOCl + h\nu \rightarrow OH + Cl$                                                 | jx(ip_HOCl)      | see note  |
| J6301a | StTrGNClJ | $ClNO_3 + h\nu \rightarrow Cl + NO_3$                                             | jx(ip_ClN03)     | see note  |
| J6301b | StTrGNClJ | $ClNO_3 + h\nu \rightarrow ClO + NO_2$                                            | jx(ip_ClON02)    | see note  |
| J6400  | StGClJ    | $CH_3Cl + h\nu \rightarrow Cl + CH_3O_2$                                          | jx(ip_CH3Cl)     | see note  |



Table 2: Photolysis reactions (... continued)

| #     | labels     | reaction                                                                                                      | rate coefficient | reference |
|-------|------------|---------------------------------------------------------------------------------------------------------------|------------------|-----------|
| J6401 | StGClJ     | $\text{CCl}_4 + h\nu \rightarrow 4 \text{ Cl}$                                                                | jx(ip_CCl4)      | see note  |
| J6402 | StGCClJ    | $\text{CH}_3\text{CCl}_3 + h\nu \rightarrow 3 \text{ Cl}$                                                     | jx(ip_CH3CCl3)   | see note  |
| J6500 | StGFClJ    | $\text{CFCl}_3 + h\nu \rightarrow 3 \text{ Cl}$                                                               | jx(ip_CFC13)     | see note  |
| J6501 | StGFClJ    | $\text{CF}_2\text{Cl}_2 + h\nu \rightarrow 2 \text{ Cl}$                                                      | jx(ip_CF2Cl2)    | see note  |
| J7200 | StTrGBrJ   | $\text{HOBr} + h\nu \rightarrow \text{Br} + \text{OH}$                                                        | jx(ip_HOBr)      | see note  |
| J7301 | StTrGNBrJ  | $\text{BrNO}_3 + h\nu \rightarrow 0.29 \text{ Br} + 0.29 \text{ NO}_3 + 0.71 \text{ BrO} + 0.71 \text{ NO}_2$ | jx(ip_BrNO3)     | see note  |
| J7400 | StGBrJ     | $\text{CH}_3\text{Br} + h\nu \rightarrow \text{Br} + \text{CH}_3\text{O}_2$                                   | jx(ip_CH3Br)     | see note  |
| J7500 | StGFBBrJ   | $\text{CF}_3\text{Br} + h\nu \rightarrow \text{Br}$                                                           | jx(ip_CF3Br)     | see note  |
| J7600 | StTrGClBrJ | $\text{BrCl} + h\nu \rightarrow \text{Br} + \text{Cl}$                                                        | jx(ip_BrCl)      | see note  |
| J7601 | StGFBBrJ   | $\text{CF}_2\text{ClBr} + h\nu \rightarrow \text{Br} + \text{Cl}$                                             | jx(ip_CF2ClBr)   | see note  |
| J9002 | StGSJ      | $\text{SF}_6 + h\nu \rightarrow \text{products}$                                                              | JX(ip_SF6)       | see note  |

\*Notes:

J-values are calculated with an external module and then supplied to the MECCA chemistry

J6100: Stimpfle et al. (2004) claim that the combination of absorption cross sections from Burkholder et al. (1990) and the  $\text{Cl}_2\text{O}_2$  formation rate coefficient by

Sander et al. (2003) can approximately reproduce the observed  $\text{Cl}_2\text{O}_2/\text{ClO}$  ratios and ozone depletion. They give an almost zenith-angle independent ratio of 1.4 for Burkholder et al. (1990) to Sander et al. (2003) J-values. The IUPAC recommendation for the  $\text{Cl}_2\text{O}_2$  formation rate is about 5 to 15 % less than the value by Sander

et al. (2003) but more than 20 % larger than the value by Sander et al. (2000). The J-values by Burkholder et al. (1990) are within the uncertainty range of the IUPAC recommendation.

J7301: The quantum yields are from Sander et al. (2003).

Table 3: Henry’s law coefficients

| substance                      | $\frac{k_H^\ominus}{\text{M/atm}}$   | $\frac{-\Delta_{\text{soln}}H/R}{\text{K}}$ | reference                       |
|--------------------------------|--------------------------------------|---------------------------------------------|---------------------------------|
| O <sub>2</sub>                 | $1.3 \times 10^{-3}$                 | 1500.                                       | Wilhelm et al. (1977)           |
| O <sub>3</sub>                 | $1.2 \times 10^{-2}$                 | 2560.                                       | Chameides (1984)                |
| OH                             | $3.0 \times 10^1$                    | 4300.                                       | Hanson et al. (1992)            |
| HO <sub>2</sub>                | $3.9 \times 10^3$                    | 5900.                                       | Hanson et al. (1992)            |
| H <sub>2</sub> O <sub>2</sub>  | $1. \times 10^5$                     | 6338.                                       | Lind and Kok (1994)             |
| NO                             | $1.9 \times 10^{-3}$                 | 1480.                                       | Schwartz and White (1981)       |
| NO <sub>2</sub>                | $7.0 \times 10^{-3}$                 | 2500.                                       | Lee and Schwartz (1981)*        |
| NO <sub>3</sub>                | 2.                                   | 2000.                                       | Thomas et al. (1993)            |
| HONO                           | $4.9 \times 10^1$                    | 4780.                                       | Schwartz and White (1981)       |
| HNO <sub>3</sub>               | $2.45 \times 10^6 / 1.5 \times 10^1$ | 8694.                                       | Brimblecombe and Clegg (1989)*  |
| HNO <sub>4</sub>               | $1.2 \times 10^4$                    | 6900.                                       | Régimbal and Mozurkewich (1997) |
| CH <sub>3</sub> O <sub>2</sub> | 6.                                   | 5600.                                       | Jacob (1986)*                   |
| CH <sub>3</sub> OOH            | $3.0 \times 10^2$                    | 5322.                                       | Lind and Kok (1994)             |
| HCHO                           | $7.0 \times 10^3$                    | 6425.                                       | Chameides (1984)                |
| HCOOH                          | $3.7 \times 10^3$                    | 5700.                                       | Chameides (1984)                |
| CO <sub>2</sub>                | $3.1 \times 10^{-2}$                 | 2423.                                       | Chameides (1984)                |
| Cl <sub>2</sub>                | $9.2 \times 10^{-2}$                 | 2081.                                       | Bartlett and Margerum (1999)    |
| HCl                            | 2./1.7                               | 9001.                                       | Brimblecombe and Clegg (1989)   |
| HOCl                           | $6.7 \times 10^2$                    | 5862.                                       | Huthwelker et al. (1995)        |
| Br <sub>2</sub>                | $7.7 \times 10^{-1}$                 | 3837.                                       | Bartlett and Margerum (1999)    |
| HBr                            | 1.3                                  | 10239.                                      | Brimblecombe and Clegg (1989)*  |
| HOBr                           | $9.3 \times 10^1$                    | 5862.                                       | Vogt et al. (1996)*             |
| BrCl                           | $9.4 \times 10^{-1}$                 | 5600.                                       | Bartlett and Margerum (1999)    |
| SO <sub>2</sub>                | 1.2                                  | 3120.                                       | Chameides (1984)                |
| H <sub>2</sub> SO <sub>4</sub> | $1. \times 10^{11}$                  | 0.                                          | see note                        |
| DMSO                           | $5. \times 10^4$                     | 6425.                                       | De Bruyn et al. (1994)*         |

\*Notes:

The temperature dependence of the Henry constants is:

$$K_H = K_H^\ominus \times \exp \left( \frac{-\Delta_{\text{soln}}H}{R} \left( \frac{1}{T} - \frac{1}{T^\ominus} \right) \right)$$

where  $\Delta_{\text{soln}}H$  = molar enthalpy of dissolution [J/mol]  
and  $R = 8.314 \text{ J/(mol K)}$ .

NO<sub>2</sub>: The temperature dependence is from Chameides (1969).  
(1984).

HNO<sub>3</sub>: Calculated using the acidity constant from  
Davis and de Bruin (1964).

CH<sub>3</sub>O<sub>2</sub>: This value was estimated by Jacob (1986).

HBr: Calculated using the acidity constant from Lax

HOBr: This value was estimated by Vogt et al. (1996).

H<sub>2</sub>SO<sub>4</sub>: To account for the very high Henry’s law coefficient of H<sub>2</sub>SO<sub>4</sub>, a very high value was chosen arbitrarily.

DMSO: Lower limit cited from another reference.

Table 4: Accommodation coefficients

| substance                         | $\alpha^\ominus$     | $\frac{-\Delta_{\text{obs}}H/R}{K}$ | reference                     |
|-----------------------------------|----------------------|-------------------------------------|-------------------------------|
| O <sub>2</sub>                    | 0.01                 | 2000.                               | see note                      |
| O <sub>3</sub>                    | 0.002                | 0.                                  | DeMore et al. (1997)*         |
| OH                                | 0.01                 | 0.                                  | Takami et al. (1998)*         |
| HO <sub>2</sub>                   | 0.5                  | 0.                                  | Thornton and Abbatt (2005)    |
| H <sub>2</sub> O <sub>2</sub>     | 0.077                | 3127.                               | Worsnop et al. (1989)         |
| NO                                | $5.0 \times 10^{-5}$ | 0.                                  | Saastad et al. (1993)*        |
| NO <sub>2</sub>                   | 0.0015               | 0.                                  | Ponche et al. (1993)*         |
| NO <sub>3</sub>                   | 0.04                 | 0.                                  | Rudich et al. (1996)*         |
| N <sub>2</sub> O <sub>5</sub>     | 0.1                  | 0.                                  | DeMore et al. (1997)*         |
| HONO                              | 0.04                 | 0.                                  | DeMore et al. (1997)*         |
| HNO <sub>3</sub>                  | 0.5                  | 0.                                  | Abbatt and Waschewsky (1998)* |
| HNO <sub>4</sub>                  | 0.1                  | 0.                                  | DeMore et al. (1997)*         |
| CH <sub>3</sub> O <sub>2</sub>    | 0.01                 | 2000.                               | see note                      |
| CH <sub>3</sub> OOH               | 0.0046               | 3273.                               | Magi et al. (1997)            |
| HCHO                              | 0.04                 | 0.                                  | DeMore et al. (1997)*         |
| HCOOH                             | 0.014                | 3978.                               | DeMore et al. (1997)          |
| CO <sub>2</sub>                   | 0.01                 | 2000.                               | see note                      |
| Cl <sub>2</sub>                   | 0.038                | 6546.                               | Hu et al. (1995)              |
| HCl                               | 0.074                | 3072.                               | Schweitzer et al. (2000)*     |
| HOCl                              | 0.5                  | 0.                                  | see note                      |
| ClNO <sub>3</sub>                 | 0.108                | 0.                                  | Deiber et al. (2004)*         |
| Br <sub>2</sub>                   | 0.038                | 6546.                               | Hu et al. (1995)              |
| HBr                               | 0.032                | 3940.                               | Schweitzer et al. (2000)*     |
| HOBr                              | 0.5                  | 0.                                  | Abbatt and Waschewsky (1998)* |
| BrNO <sub>3</sub>                 | 0.063                | 0.                                  | Deiber et al. (2004)*         |
| BrCl                              | 0.38                 | 6546.                               | see note                      |
| SO <sub>2</sub>                   | 0.11                 | 0.                                  | DeMore et al. (1997)          |
| H <sub>2</sub> SO <sub>4</sub>    | 0.65                 | 0.                                  | Pöschl et al. (1998)*         |
| CH <sub>3</sub> SO <sub>3</sub> H | 0.076                | 1762.                               | De Bruyn et al. (1994)        |
| DMSO                              | 0.048                | 2578.                               | De Bruyn et al. (1994)        |

\*Notes:

The temperature dependence of the accommodation coefficients is given by (Jayne et al., 1991):

$$\frac{\alpha}{1-\alpha} = \exp\left(\frac{-\Delta_{\text{obs}}G}{RT}\right)$$

$$= \exp\left(\frac{-\Delta_{\text{obs}}H}{RT} + \frac{\Delta_{\text{obs}}S}{R}\right)$$

where  $\Delta_{\text{obs}}G$  is the Gibbs free energy barrier of the transition state toward solution (Jayne et al., 1991), and  $\Delta_{\text{obs}}H$  and  $\Delta_{\text{obs}}S$  are the corresponding enthalpy and entropy, respectively. The equation can be rearranged to:

$$\ln\left(\frac{\alpha}{1-\alpha}\right) = \frac{-\Delta_{\text{obs}}H}{R} \times \frac{1}{T} + \frac{-\Delta_{\text{obs}}S}{R}$$

and further:

$$\text{d} \ln\left(\frac{\alpha}{1-\alpha}\right) \bigg/ \text{d}\left(\frac{1}{T}\right) = \frac{-\Delta_{\text{obs}}H}{R}$$

If no data were available, a value of  $\alpha = 0.01$ ,  $\alpha = 0.1$ , or  $\alpha = 0.5$ , and a temperature dependence of  $-\Delta_{\text{obs}}H/R = 2000$  K has been assumed.

O<sub>2</sub>: Estimate.

O<sub>3</sub>: Value measured at 292 K.

OH: Value measured at 293 K.

NO: Value measured between 193 and 243 K.

NO<sub>2</sub>: Value measured at 298 K.

NO<sub>3</sub>: Value is a lower limit, measured at 273 K.

N<sub>2</sub>O<sub>5</sub>: Value for sulfuric acid, measured between 195 and 300 K.

HONO: Value measured between 247 and 297 K.

HNO<sub>3</sub>: Value measured at room temperature. Abbatt and Waschewsky (1998) say  $\gamma > 0.2$ . Here  $\alpha = 0.5$  is used.

HNO<sub>4</sub>: Value measured at 200 K for water ice.

CH<sub>3</sub>O<sub>2</sub>: Estimate.

HCHO: Value measured between 260 and 270 K.

CO<sub>2</sub>: Estimate.

HCl: Temperature dependence derived from published data at 2 different temperatures

HOCl: Assumed to be the same as  $\alpha(\text{HOBr})$ .

ClNO<sub>3</sub>: Value measured at 274.5 K.

HBr: Temperature dependence derived from published data at 2 different temperatures

HOBr: Value measured at room temperature. Abbatt and Waschewsky (1998) say  $\gamma > 0.2$ . Here  $\alpha = 0.5$  is used.

BrNO<sub>3</sub>: Value measured at 273 K.

BrCl: Assumed to be the same as  $\alpha(\text{Cl}_2)$ .

H<sub>2</sub>SO<sub>4</sub>: Value measured at 303 K.

Table 5: Henry’s law equilibria

| # | labels | reaction | rate coefficient | reference |
|---|--------|----------|------------------|-----------|
|---|--------|----------|------------------|-----------|

\*Notes:

The forward (**k<sub>exf</sub>**) and backward (**k<sub>exb</sub>**) rate coefficients are calculated in the file **messy\_mecca\_aero.f90** using the accommodation coefficients in subroutine **mecca\_aero\_alpha** and Henry’s law constants in subroutine **mecca\_aero\_henry**.

$k_{\text{mt}}$  = mass transfer coefficient

lwc = liquid water content of aerosol mode

H3201, H6300, H6301, H6302, H7300, H7301, H7302, H7601, H7602: For uptake of  $X$  ( $= \text{N}_2\text{O}_5$ ,  $\text{ClNO}_3$ ,  $\text{BrNO}_3$ ) and subsequent reaction with  $\text{H}_2\text{O}$ ,  $\text{Cl}^-$ , and  $\text{Br}^-$ , we define  $k_{\text{exf}}(X) = k_{\text{mt}}(X) \times lwc / ([\text{H}_2\text{O}] + 5.0E2[\text{Cl}^-] + 3.0E5[\text{Br}^-])$ .

H6301, H6302, H7601: The total uptake is determined by  $k_{\text{mt}}(\text{ClNO}_3)$ . The relative rates are assumed to be the same as for  $\text{N}_2\text{O}_5$  (H3201, H6300, H7300).

H7301, H7302, H7602: The total uptake is determined by  $k_{\text{mt}}(\text{BrNO}_3)$ . The relative rates are assumed to be the same as for  $\text{N}_2\text{O}_5$  (H3201, H6300, H7300).

Table 6: Heterogeneous reactions

| #      | labels     | reaction                                                                                | rate coefficient                    | reference |
|--------|------------|-----------------------------------------------------------------------------------------|-------------------------------------|-----------|
| HET200 | StHetN     | $\text{N}_2\text{O}_5 + \text{H}_2\text{O} \rightarrow 2 \text{HNO}_3$                  | <code>khet_St(ihs_N205_H20)</code>  | see note  |
| HET201 | TrHetN     | $\text{N}_2\text{O}_5 \rightarrow 2 \text{NO}_3^-(\text{aq}) + 2 \text{H}^+(\text{aq})$ | <code>khet_Tr(iht_N205)</code>      | see note  |
| HET202 | TrHetN     | $\text{HNO}_3 \rightarrow \text{NO}_3^-(\text{aq}) + \text{H}^+(\text{aq})$             | <code>khet_Tr(iht_HNO3)</code>      | see note  |
| HET410 | StHetCl    | $\text{HOCl} + \text{HCl} \rightarrow \text{Cl}_2 + \text{H}_2\text{O}$                 | <code>khet_St(ihs_HOCl_HCl)</code>  | see note  |
| HET420 | StHetNCl   | $\text{ClNO}_3 + \text{HCl} \rightarrow \text{Cl}_2 + \text{HNO}_3$                     | <code>khet_St(ihs_ClNO3_HCl)</code> | see note  |
| HET421 | StHetNCl   | $\text{ClNO}_3 + \text{H}_2\text{O} \rightarrow \text{HOCl} + \text{HNO}_3$             | <code>khet_St(ihs_ClNO3_H20)</code> | see note  |
| HET422 | StHetNCl   | $\text{N}_2\text{O}_5 + \text{HCl} \rightarrow \text{ClNO}_2 + \text{HNO}_3$            | <code>khet_St(ihs_N205_HCl)</code>  | see note  |
| HET510 | StHetBr    | $\text{HOBr} + \text{HBr} \rightarrow \text{Br}_2 + \text{H}_2\text{O}$                 | <code>khet_St(ihs_HOBr_HBr)</code>  | see note  |
| HET520 | StHetNBr   | $\text{BrNO}_3 + \text{H}_2\text{O} \rightarrow \text{HOBr} + \text{HNO}_3$             | <code>khet_St(ihs_BrNO3_H20)</code> | see note  |
| HET540 | StHetNClBr | $\text{ClNO}_3 + \text{HBr} \rightarrow \text{BrCl} + \text{HNO}_3$                     | <code>khet_St(ihs_ClNO3_HBr)</code> | see note  |
| HET541 | StHetNClBr | $\text{BrNO}_3 + \text{HCl} \rightarrow \text{BrCl} + \text{HNO}_3$                     | <code>khet_St(ihs_BrNO3_HCl)</code> | see note  |
| HET542 | StHetClBr  | $\text{HOCl} + \text{HBr} \rightarrow \text{BrCl} + \text{H}_2\text{O}$                 | <code>khet_St(ihs_HOCl_HBr)</code>  | see note  |
| HET543 | StHetClBr  | $\text{HOBr} + \text{HCl} \rightarrow \text{BrCl} + \text{H}_2\text{O}$                 | <code>khet_St(ihs_HOBr_HCl)</code>  | see note  |

\*Notes:

Heterogeneous reaction rates are calculated with an external module and then supplied to the MECCA chemistry (see [www.messy-interface.org](http://www.messy-interface.org) for details)

Table 7: Acid-base and other equilibria

| # | labels | reaction | $K_0[M^{m-n}]$ | $-\Delta H/R[K]$ | reference |
|---|--------|----------|----------------|------------------|-----------|
|---|--------|----------|----------------|------------------|-----------|

\*Notes:

Table 8: Aqueous phase reactions

| # | labels | reaction | $k_0$ [ $M^{1-n}s^{-1}$ ] | $-E_a/R[K]$ | reference |
|---|--------|----------|---------------------------|-------------|-----------|
|---|--------|----------|---------------------------|-------------|-----------|

\*Notes:



## References

- Abbatt, J. P. D. and Waschewsky, G. C. G.: Heterogeneous interactions of HOBr, HNO<sub>3</sub>, O<sub>3</sub>, and NO<sub>2</sub> with deliquescent NaCl aerosols at room temperature, *J. Phys. Chem. A*, 102, 3719–3725, 1998.
- Atkinson, R.: Kinetics of the gas-phase reactions of OH radicals with alkanes and cycloalkanes, *Atmos. Chem. Phys.*, 3, 2233–2307, 2003.
- Atkinson, R., Baulch, D. L., Cox, R. A., Hampson, Jr., R. F., Kerr, J. A., Rossi, M. J., and Troe, J.: Summary of evaluated kinetic and photochemical data for atmospheric chemistry: Web version August 1999, <http://www.iupac-kinetic.ch.cam.ac.uk/>, 1999.
- Atkinson, R., Baulch, D. L., Cox, R. A., Crowley, J. N., Hampson, R. F., Hynes, R. G., Jenkin, M. E., Rossi, M. J., and Troe, J.: Evaluated kinetic and photochemical data for atmospheric chemistry: Volume I – gas phase reactions of O<sub>x</sub>, HO<sub>x</sub>, NO<sub>x</sub> and SO<sub>x</sub> species, *Atmos. Chem. Phys.*, 4, 1461–1738, 2004.
- Atkinson, R., Baulch, D. L., Cox, R. A., Crowley, J. N., Hampson, Jr., R. F., Hynes, R. G., Jenkin, M. E., Kerr, J. A., Rossi, M. J., and Troe, J.: Summary of evaluated kinetic and photochemical data for atmospheric chemistry: Web version March 2005, <http://www.iupac-kinetic.ch.cam.ac.uk/>, 2005.
- Atkinson, R., Baulch, D. L., Cox, R. A., Crowley, J. N., Hampson, R. F., Hynes, R. G., Jenkin, M. E., Rossi, M. J., and Troe, J.: Evaluated kinetic and photochemical data for atmospheric chemistry: Volume II – gas phase reactions of organic species, *Atmos. Chem. Phys.*, 6, 3625–4055, 2006.
- Atkinson, R., Baulch, D. L., Cox, R. A., Crowley, J. N., Hampson, R. F., Hynes, R. G., Jenkin, M. E., Rossi, M. J., and Troe, J.: Evaluated kinetic and photochemical data for atmospheric chemistry: Volume III — gas phase reactions of inorganic halogens, *Atmos. Chem. Phys.*, 7, 981–1191, 2007.
- Barone, S. B., Turnipseed, A. A., and Ravishankara, A. R.: Role of adducts in the atmospheric oxidation of dimethyl sulfide, *Faraday Discuss.*, 100, 39–54, 1995.
- Bartlett, W. P. and Margerum, D. W.: Temperature dependencies of the Henry’s law constant and the aqueous phase dissociation constant of bromine chloride, *Environ. Sci. Technol.*, 33, 3410–3414, 1999.
- Brimblecombe, P. and Clegg, S. L.: Erratum, *J. Atmos. Chem.*, 8, 95, 1989.
- Burkholder, J. B., Orlando, J. J., and Howard, C. J.: Ultraviolet absorption cross sections of Cl<sub>2</sub>O<sub>2</sub> between 210 and 410 nm, *J. Phys. Chem.*, 94, 687–695, 1990.
- Canosa-Mas, C. E., King, M. D., Lopez, R., Percival, C. J., Wayne, R. P., Shallcross, D. E., Pyle, J. A., and Daele, V.: Is the reaction between CH<sub>3</sub>(O)O<sub>2</sub> and NO<sub>3</sub> important in the night-time troposphere?, *J. Chem. Soc. Faraday Trans.*, 92, 2211–2222, 1996.
- Chameides, W. L.: The photochemistry of a remote marine stratiform cloud, *J. Geophys. Res.*, 89D, 4739–4755, 1984.
- Christensen, L. E., Okumura, M., Sander, S. P., Salawitch, R. J., Toon, G. C., Sen, B., Blavier, J.-F., and Jucks, K. W.: Kinetics of HO<sub>2</sub> + HO<sub>2</sub> → H<sub>2</sub>O<sub>2</sub> + O<sub>2</sub>: Implications for stratospheric H<sub>2</sub>O<sub>2</sub>, *Geophys. Res. Lett.*, 29, doi:10.1029/2001GL014525, 2002.
- Davis, Jr., W. and de Bruin, H. J.: New activity coefficients of 0–100 per cent aqueous nitric acid, *J. Inorg. Nucl. Chem.*, 26, 1069–1083, 1964.
- De Bruyn, W. J., Shorter, J. A., Davidovits, P., Worsnop, D. R., Zahniser, M. S., and Kolb, C. E.: Uptake of gas-phase sulfur species methanesulfonic acid, dimethylsulfoxide, and dimethyl sulfone by aqueous surfaces, *J. Geophys. Res.*, 99D, 16 927–16 932, 1994.
- Deiber, G., George, C., Le Calvé, S., Schweitzer, F., and Mirabel, P.: Uptake study of ClONO<sub>2</sub> and BrONO<sub>2</sub> by halide containing droplets, *Atmos. Chem. Phys.*, 4, 1291–1299, 2004.
- DeMore, W. B., Sander, S. P., Golden, D. M., Hampson, R. F., Kurylo, M. J., Howard, C. J., Ravishankara, A. R., Kolb, C. E., and Molina, M. J.: Chemical kinetics and photochemical data for use in stratospheric modeling. Evaluation number 12, JPL Publication 97-4, Jet Propulsion Laboratory, Pasadena, CA, 1997.
- Funke, B., García-Comas, M., López-Puertas, M., Glatthor, N., Stiller, G. P., von Clarmann, T., Semeniuk, K., and McConnell, J. C.: Enhancement of N<sub>2</sub>O during the October/November 2003 solar proton events, *Atmospheric Chemistry and Physics*, 8, 3805–3815, 2008.
- Hanson, D. R., Burkholder, J. B., Howard, C. J., and Ravishankara, A. R.: Measurement of OH and HO<sub>2</sub> radical uptake coefficients on water and sulfuric acid surfaces, *J. Phys. Chem.*, 96, 4979–4985, 1992.
- Hu, J. H., Shi, Q., Davidovits, P., Worsnop, D. R., Zahniser, M. S., and Kolb, C. E.: Reactive uptake of Cl<sub>2</sub>(g) and Br<sub>2</sub>(g) by aqueous surfaces as a function of Br<sup>−</sup> and I<sup>−</sup> ion concentration: The effect of chemical reaction at the interface, *J. Phys. Chem.*, 99, 8768–8776, 1995.

- Huthwelker, T., Clegg, S. L., Peter, T., Carslaw, K., Luo, B. P., and Brimblecombe, P.: Solubility of HOCl in water and aqueous H<sub>2</sub>SO<sub>4</sub> to stratospheric temperatures, *J. Atmos. Chem.*, 21, 81–95, 1995.
- Hynes, A. J. and Wine, P. H.: The atmospheric chemistry of dimethylsulfoxide (DMSO) kinetics and mechanism of the OH + DMSO reaction, *J. Atmos. Chem.*, 24, 23–37, 1996.
- Jacob, D. J.: Chemistry of OH in remote clouds and its role in the production of formic acid and peroxy-monosulfate, *J. Geophys. Res.*, 91D, 9807–9826, 1986.
- Jayne, J. T., Duan, S. X., Davidovits, P., Worsnop, D. R., Zahniser, M. S., and Kolb, C. E.: Uptake of gas-phase alcohol and organic acid molecules by water surfaces, *J. Phys. Chem.*, 95, 6329–6336, 1991.
- Kircher, C. C. and Sander, S. P.: Kinetics and mechanism of HO<sub>2</sub> and DO<sub>2</sub> disproportionations, *J. Phys. Chem.*, 88, 2082–2091, 1984.
- Kirchner, F. and Stockwell, W. R.: Effect of peroxy radical reactions on the predicted concentrations of ozone, nitrogenous compounds, and radicals, *J. Geophys. Res.*, 101D, 21 007–21 022, 1996.
- Lax, E.: Taschenbuch für Chemiker und Physiker, Springer Verlag, Berlin, 1969.
- Lee, Y.-N. and Schwartz, S. E.: Reaction kinetics of nitrogen dioxide with liquid water at low partial pressure, *J. Phys. Chem.*, 85, 840–848, 1981.
- Lind, J. A. and Kok, G. L.: Correction to “Henry’s law determinations for aqueous solutions of hydrogen peroxide, methylhydroperoxide, and peroxyacetic acid” by John A. Lind and Gregory L. Kok, *J. Geophys. Res.*, 99D, 21 119, 1994.
- Madronich, S. and Calvert, J. G.: Permutation reactions of organic peroxy radicals in the troposphere, *J. Geophys. Res.*, 95D, 5697–5715, 1990.
- Magi, L., Schweitzer, F., Pallares, C., Cherif, S., Mirabel, P., and George, C.: Investigation of the uptake rate of ozone and methyl hydroperoxide by water surfaces, *J. Phys. Chem. A*, 101, 4943–4949, 1997.
- McCabe, D. C., Gierczak, T., Talukdar, R. K., and Ravishankara, A. R.: Kinetics of the reaction OH + CO under atmospheric conditions, *Geophys. Res. Lett.*, 28, 3135–3138, 2001.
- Ponche, J. L., George, C., and Mirabel, P.: Mass transfer at the air/water interface: Mass accommodation coefficients of SO<sub>2</sub>, HNO<sub>3</sub>, NO<sub>2</sub> and NH<sub>3</sub>, *J. Atmos. Chem.*, 16, 1–21, 1993.
- Pöschl, U., Canagaratna, M., Jayne, J. T., Molina, L. T., Worsnop, D. R., Kolb, C. E., and Molina, M. J.: Mass accommodation coefficient of H<sub>2</sub>SO<sub>4</sub> vapor on aqueous sulfuric acid surfaces and gaseous diffusion coefficient of H<sub>2</sub>SO<sub>4</sub> in N<sub>2</sub>/H<sub>2</sub>O, *J. Phys. Chem. A*, 102, 10 082–10 089, 1998.
- Régimbal, J.-M. and Mozurkewich, M.: Peroxynitric acid decay mechanisms and kinetics at low pH, *J. Phys. Chem. A*, 101, 8822–8829, 1997.
- Rudich, Y., Talukdar, R. K., Imamura, T., Fox, R. W., and Ravishankara, A. R.: Uptake of NO<sub>3</sub> on KI solutions: Rate coefficient for the NO<sub>3</sub> + I<sup>−</sup> reaction and gas-phase diffusion coefficients for NO<sub>3</sub>, *Chem. Phys. Lett.*, 261, 467–473, 1996.
- Saastad, O. W., Ellermann, T., and Nielsen, C. J.: On the adsorption of NO and NO<sub>2</sub> on cold H<sub>2</sub>O/H<sub>2</sub>SO<sub>4</sub> surfaces, *Geophys. Res. Lett.*, 20, 1191–1193, 1993.
- Sander, S. P., Friedl, R. R., DeMore, W. B., Golden, D. M., Kurylo, M. J., Hampson, R. F., Huie, R. E., Moortgat, G. K., Ravishankara, A. R., Kolb, C. E., and Molina, M. J.: Chemical kinetics and photochemical data for use in stratospheric modeling. Supplement to evaluation 12: Update of key reactions. Evaluation number 13, JPL Publication 00-3, Jet Propulsion Laboratory, Pasadena, CA, <http://jpldataeval.jpl.nasa.gov/>, 2000.
- Sander, S. P., Finlayson-Pitts, B. J., Friedl, R. R., Golden, D. M., Huie, R. E., Kolb, C. E., Kurylo, M. J., Molina, M. J., Moortgat, G. K., Orkin, V. L., and Ravishankara, A. R.: Chemical Kinetics and Photochemical Data for Use in Atmospheric Studies, Evaluation Number 14, JPL Publication 02-25, Jet Propulsion Laboratory, Pasadena, CA, 2003.
- Sander, S. P., Friedl, R. R., Golden, D. M., Kurylo, M. J., Moortgat, G. K., Keller-Rudek, H., Wine, P. H., Ravishankara, A. R., Kolb, C. E., Molina, M. J., Finlayson-Pitts, B. J., Huie, R. E., and Orkin, V. L.: Chemical Kinetics and Photochemical Data for Use in Atmospheric Studies, Evaluation Number 15, JPL Publication 06-2, Jet Propulsion Laboratory, Pasadena, CA, 2006.
- Schwartz, S. E. and White, W. H.: Solubility equilibria of the nitrogen oxides and oxyacids in dilute aqueous solution, in: *Advances in Environmental Science and Engineering*, edited by Pfafflin, J. R. and Ziegler, E. N., vol. 4, pp. 1–45, Gordon and Breach Science Publishers, NY, 1981.
- Schweitzer, F., Mirabel, P., and George, C.: Uptake of hydrogen halides by water droplets, *J. Phys. Chem. A*, 104, 72–76, 2000.
- Sivakumaran, V., Hölscher, D., Dillon, T. J., and Crowley, J. N.: Reaction between OH and HCHO:

- temperature dependent rate coefficients (202–399 K) and product pathways (298 K), *Phys. Chem. Chem. Phys.*, 5, 4821–4827, 2003.
- Stimpfle, R. M., Wilmouth, D. M., Salawitch, R. J., and Anderson, J. G.: First measurements of ClOOCl in the stratosphere: The coupling of ClOOCl and ClO in the Arctic polar vortex, *J. Geophys. Res.*, 109, doi:10.1029/2003JD003811, 2004.
- Takami, A., Kato, S., Shimono, A., and Koda, S.: Uptake coefficient of OH radical on aqueous surface, *Chem. Phys.*, 231, 215–227, 1998.
- Thomas, K., Volz-Thomas, A., and Kley, D.: Zur Wechselwirkung von NO<sub>3</sub>-Radikalen mit wässrigen Lösungen: Bestimmung des Henry- und des Massenakkommodationskoeffizienten, Ph.D. thesis, Institut für Chemie und Dynamik der Geosphäre 2, Forschungszentrum Jülich GmbH, Germany, 1993.
- Thornton, J. and Abbatt, J. P. D.: Measurements of HO<sub>2</sub> uptake to aqueous aerosol: Mass accommodation coefficients and net reactive loss, *J. Geophys. Res.*, 110D, doi:10.1029/2004JD005402, 2005.
- Tyndall, G. S., Cox, R. A., Granier, C., Lesclaux, R., Moortgat, G. K., Pilling, M. J., Ravishankara, A. R., and Wallington, T. J.: The atmospheric chemistry of small organic peroxy radicals, *J. Geophys. Res.*, 106D, 12 157–12 182, 2001.
- Villenave, E. and Lesclaux, R.: Kinetics of the cross reactions of CH<sub>3</sub>O<sub>2</sub> and C<sub>2</sub>H<sub>5</sub>O<sub>2</sub> radicals with selected peroxy radicals, *J. Phys. Chem.*, 100, 14 372–14 382, 1996.
- Vogt, R., Crutzen, P. J., and Sander, R.: A mechanism for halogen release from sea-salt aerosol in the remote marine boundary layer, *Nature*, 383, 327–330, doi:10.1038/383327A0, 1996.
- von Kuhlmann, R.: Tropospheric photochemistry of ozone, its precursors and the hydroxyl radical: A 3D-modeling study considering non-methane hydrocarbons, Ph.D. thesis, Johannes Gutenberg-Universität, Mainz, Germany, 2001.
- Wilhelm, E., Battino, R., and Wilcock, R. J.: Low-pressure solubility of gases in liquid water, *Chem. Rev.*, 77, 219–262, 1977.
- Worsnop, D. R., Zahniser, M. S., Kolb, C. E., Gardner, J. A., Watson, L. R., van Doren, J. M., Jayne, J. T., and Davidovits, P.: The temperature dependence of mass accommodation of SO<sub>2</sub> and H<sub>2</sub>O<sub>2</sub> on aqueous surfaces, *J. Phys. Chem.*, 93, 1159–1172, 1989.
- Zaveri, R. A. and Peters, L. K.: A new lumped structure photochemical mechanism for large-scale applications, *J. Geophys. Res.*, 104D, 30 387–30 415, 1999.
