# Supplementary material for: Energetic particle precipitation in ECHAM5/MESSy – Part 2: Solar proton events
Source: Copernicus journal article supplement (doi:10.5194/acp-10-7285-2010), 2010-08-06
Supplement: Supplementary file 3 [file supplementfigures.pdf › supplementfigures.pdf]

# Supplemental Material:

## Additional Figures

**A. J. G. Baumgaertner, P. Jöckel,  
H. Riede, G. Stiller & B. Funke**

Correspondance to:  
A. J. G. Baumgaertner  
Air Chemistry Department  
Max Planck Institute for Chemistry  
PO Box 3060, 55020 Mainz, Germany  
`work@andreas-baumgaertner.net`

This document is part of the electronic supplement of our article “Energetic particle precipitation in ECHAM5/MESSy, Part 2: Solar Proton Events” in Atmos. Chem. Phys. Disc. (2010), available at: <http://www.atmos-chem-phys-discuss.net>

Date: 1 July 2010

## 1 Simulation S-SPE

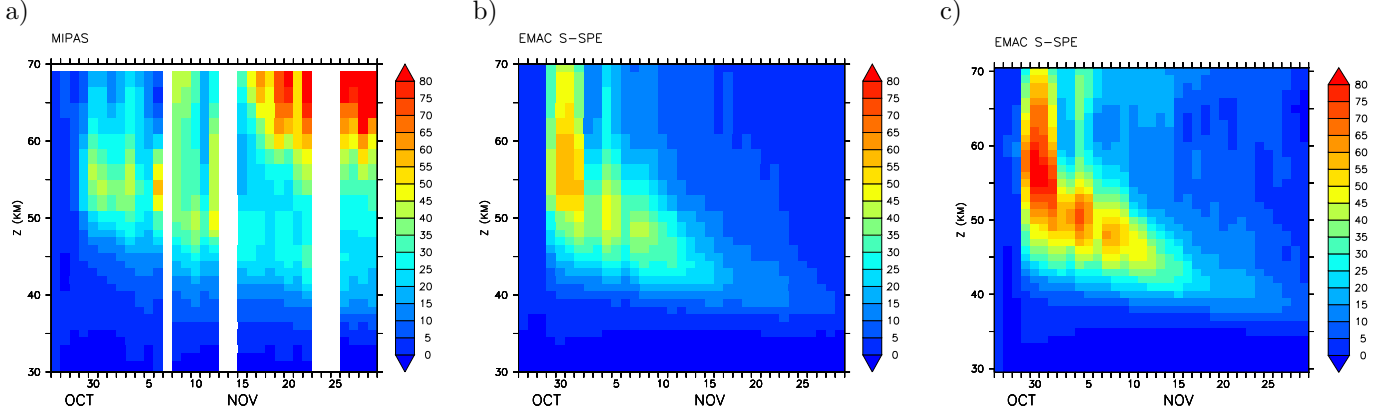

Figure 1: NO<sub>2</sub> change (ppbv) relative to 26 October for 70–90°N for a) MIPAS, b) EMAC simulation S-SPE with MIPAS averaging kernel (AK) applied, c) without MIPAS AK applied.

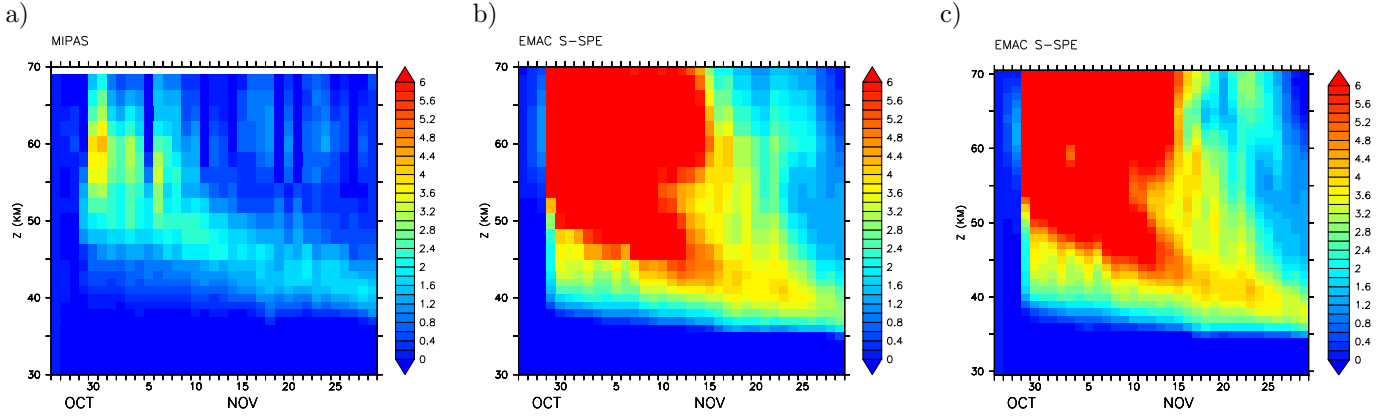

Figure 2: N<sub>2</sub>O change (ppbv) relative to 26 October for 70–90°N for a) MIPAS, b) EMAC simulation S-SPE with MIPAS AK applied, c) without MIPAS AK applied.

## 2 Simulation S-SPE-FUNKE

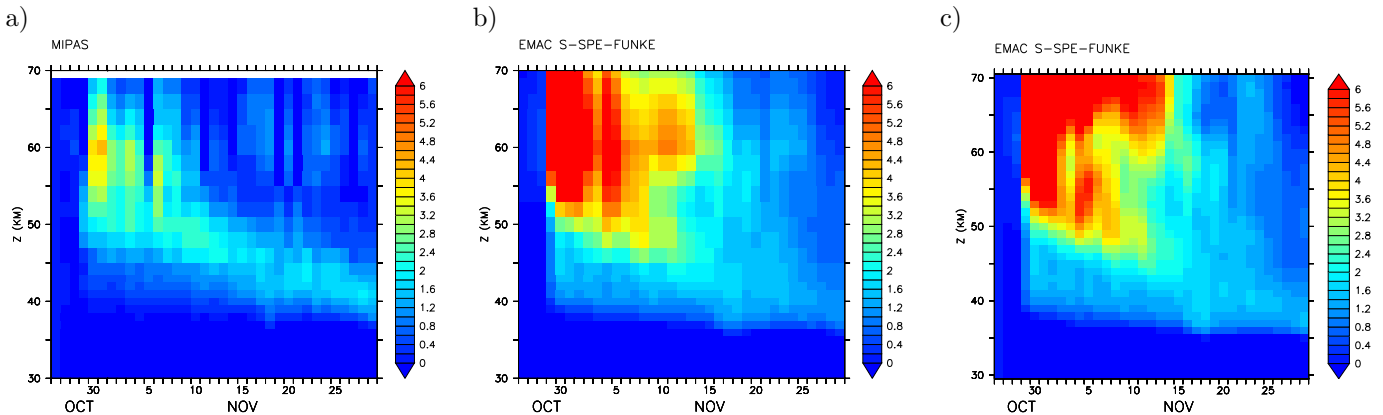

Figure 3: N<sub>2</sub>O change (ppbv) relative to 26 October for 70–90°N for a) MIPAS, b) EMAC simulation S-SPE-FUNKE with MIPAS AK applied, c) without MIPAS AK applied.

### 3 Simulation S-SPE-NNOEFF

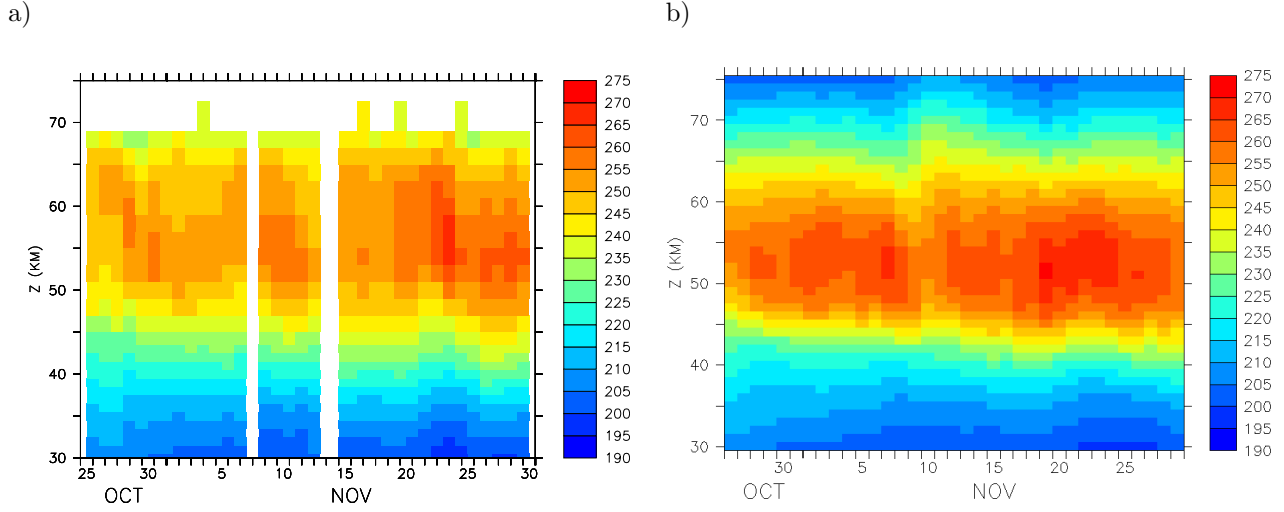

Figure 4: Temperature for 26 October to 30 November 2003 for 70–90°N for a) MIPAS, b) EMAC simulation S-SPE-NNOEFF.

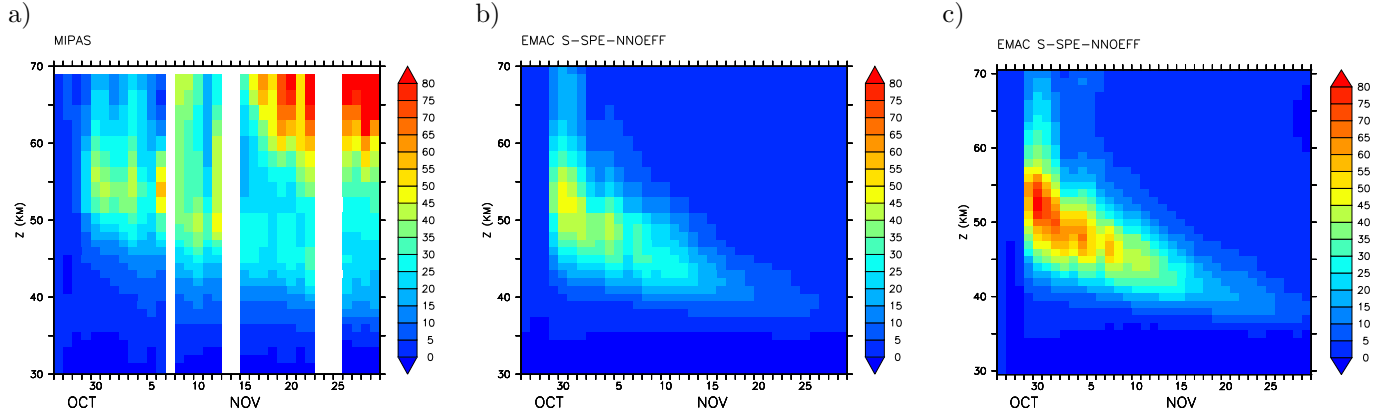

Figure 5: NO<sub>2</sub> change (ppbv) relative to 26 October for 70–90°N for a) MIPAS, b) EMAC simulation S-SPE-NNOEFF with MIPAS AK applied, c) without MIPAS AK applied.

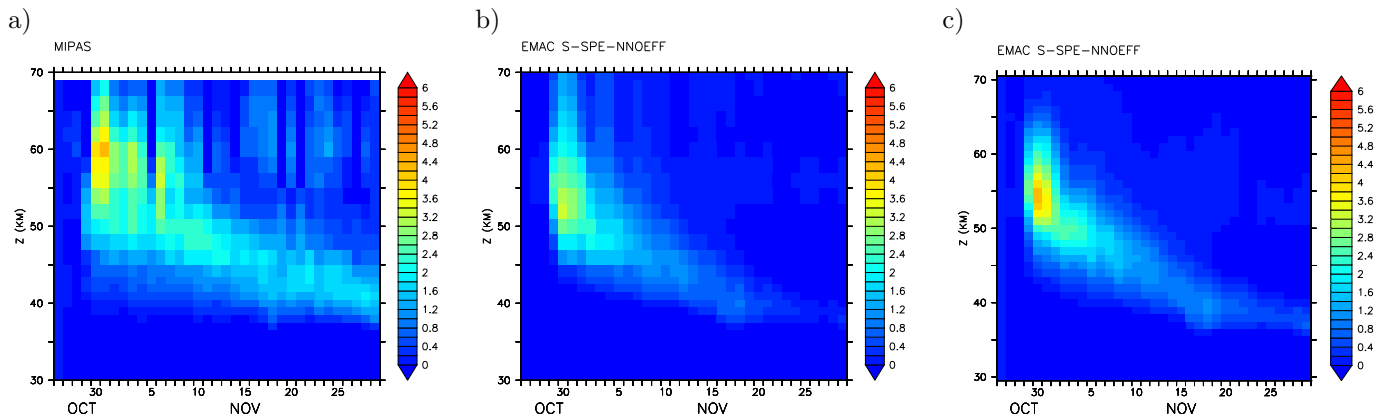

Figure 6: N<sub>2</sub>O changes (ppbv) relative to 26 October for 70–90°N for a) MIPAS, b) EMAC simulation S-SPE-NNOEFF with MIPAS AK applied, c) without MIPAS AK applied.

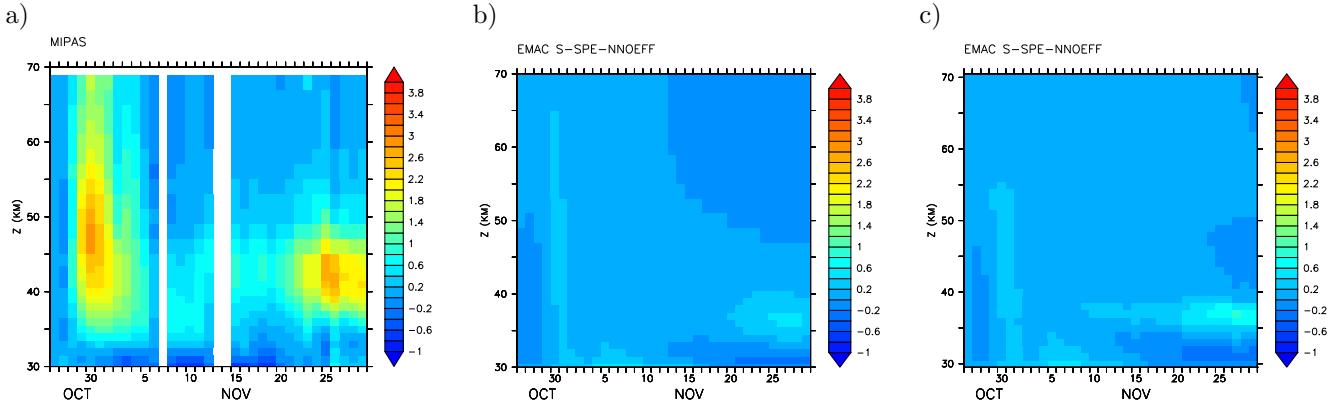

Figure 7:  $\text{HNO}_3$  changes (ppbv) relative to 26 October for  $70\text{--}90^\circ\text{N}$  for a) MIPAS, b) EMAC simulation S-SPE-NNOEFF with MIPAS AK applied, c) without MIPAS AK applied.

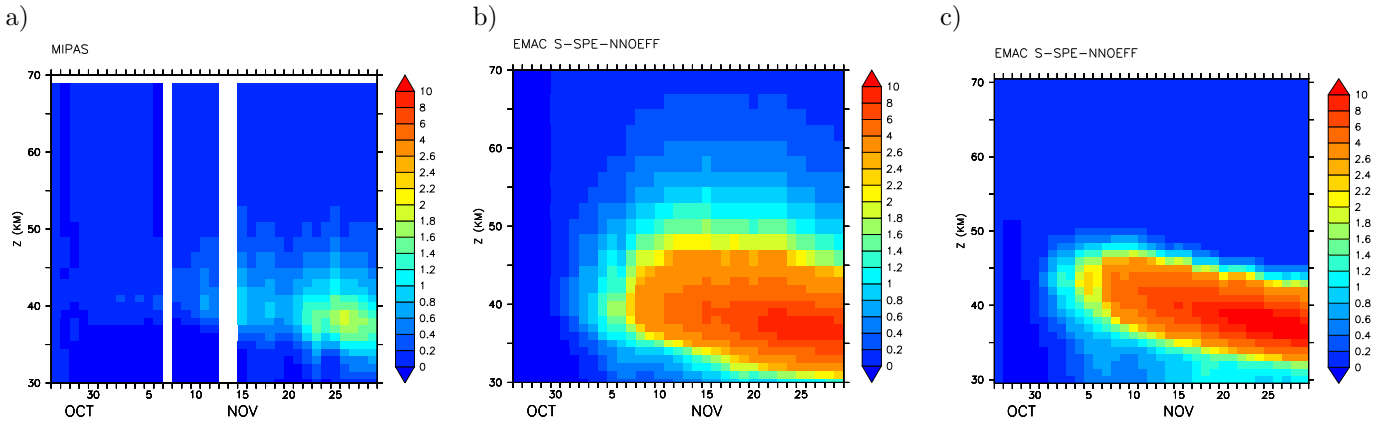

Figure 8:  $\text{N}_2\text{O}_5$  changes (ppbv) relative to 26 October for  $70\text{--}90^\circ\text{N}$  for a) MIPAS, b) EMAC simulation S-SPE-NNOEFF with MIPAS AK applied, c) without MIPAS AK applied.

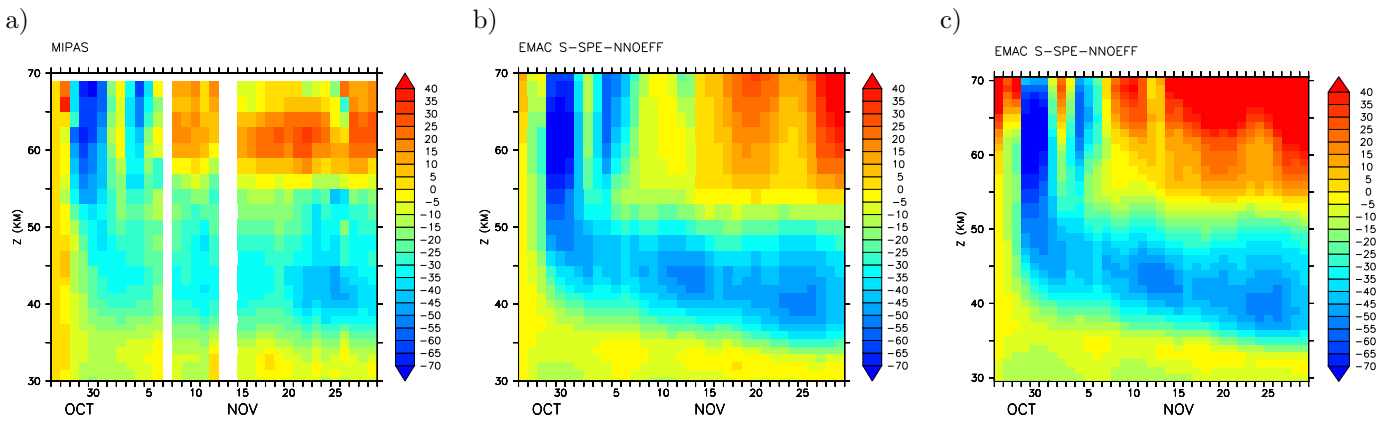

Figure 9: Ozone mixing ratio percentage change relative to 26 October for  $70\text{--}90^\circ\text{N}$ ; a) MIPAS, b) EMAC simulation S-SPE-NNOEFF with MIPAS AK applied, c) without MIPAS AK applied.

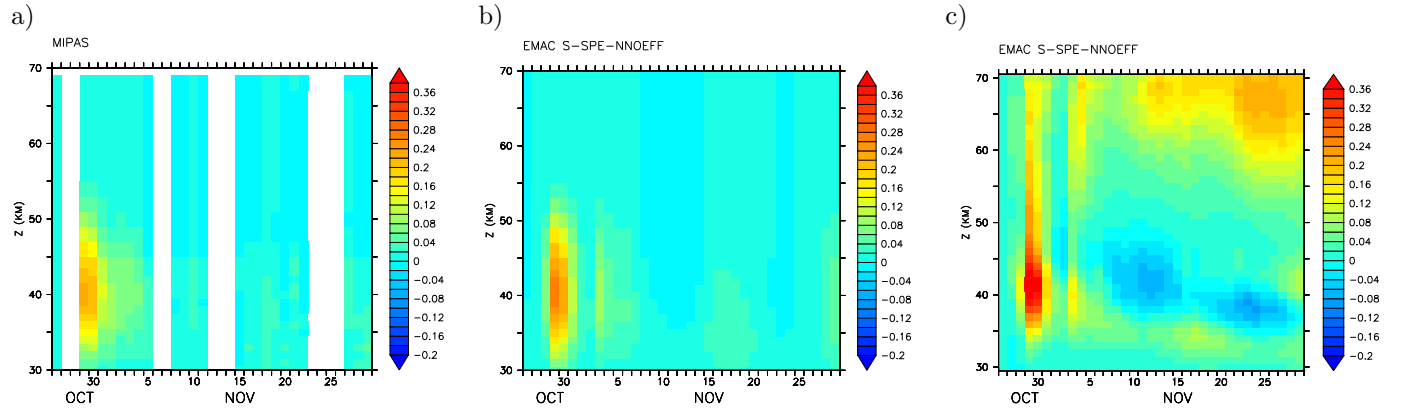

Figure 10: HOCl changes (ppbv) relative to 26 October for 70–90°N for a) MIPAS, b) EMAC simulation S-SPE-NNOEFF with MIPAS AK applied, c) without MIPAS AK applied.

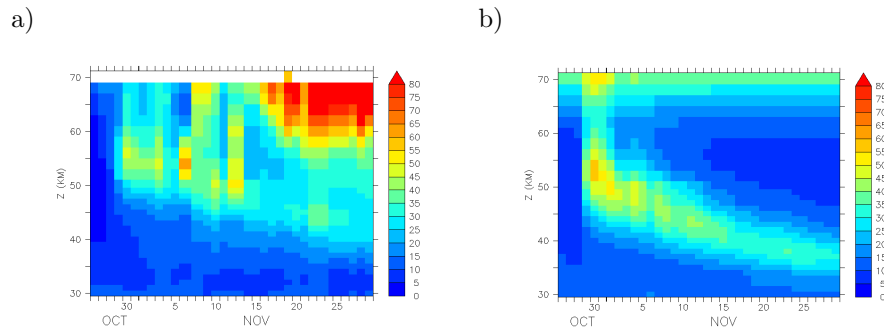

Figure 11: NO<sub>y</sub> (here: NO<sub>2</sub> + 2xN<sub>2</sub>O<sub>5</sub> + HNO<sub>3</sub> + ClONO<sub>2</sub>) changes (ppbv) relative to 26 October for 70–90°N for a) MIPAS, b) EMAC simulation S-SPE-NNOEFF with MIPAS AK applied.
